# Supplementary material for: Investigating service delivery and perinatal outcomes during the low prevalence first year of COVID-19 in a multiethnic Australian population: a cohort study
Source: PubMed Central journal article supplement — BMJ Open. 2022 Jul 12;12(7):e062409. doi: 10.1136/bmjopen-2022-062409 (PMC9277027; doi:10.1136/bmjopen-2022-062409), 2022-07-12
Supplement: bmjopen-2022-062409.draft_revisions.pdf [file bmjopen-2022-062409.draft_revisions.pdf]

# BMJ Open

BMJ Open is committed to open peer review. As part of this commitment we make the peer review history of every article we publish publicly available.

When an article is published we post the peer reviewers' comments and the authors' responses online. We also post the versions of the paper that were used during peer review. These are the versions that the peer review comments apply to.

The versions of the paper that follow are the versions that were submitted during the peer review process. They are not the versions of record or the final published versions. They should not be cited or distributed as the published version of this manuscript.

BMJ Open is an open access journal and the full, final, typeset and author-corrected version of record of the manuscript is available on our site with no access controls, subscription charges or pay-per-view fees (<http://bmjopen.bmj.com>).

If you have any questions on BMJ Open's open peer review process please email [info.bmjopen@bmj.com](mailto:info.bmjopen@bmj.com)

# BMJ Open

## Investigating service delivery and perinatal outcomes during the low prevalence first year of COVID-19 in a multiethnic Australian population: a cohort study

|                               |                                                                                                                                                                                                                                                                                                                                                                                                                                                                                                                                                                                                                                                                                                                                                                                                                                                                                                                                                                                                                                                                                                                                                                                                                                                                                                                                                                |
|-------------------------------|----------------------------------------------------------------------------------------------------------------------------------------------------------------------------------------------------------------------------------------------------------------------------------------------------------------------------------------------------------------------------------------------------------------------------------------------------------------------------------------------------------------------------------------------------------------------------------------------------------------------------------------------------------------------------------------------------------------------------------------------------------------------------------------------------------------------------------------------------------------------------------------------------------------------------------------------------------------------------------------------------------------------------------------------------------------------------------------------------------------------------------------------------------------------------------------------------------------------------------------------------------------------------------------------------------------------------------------------------------------|
| Journal:                      | <i>BMJ Open</i>                                                                                                                                                                                                                                                                                                                                                                                                                                                                                                                                                                                                                                                                                                                                                                                                                                                                                                                                                                                                                                                                                                                                                                                                                                                                                                                                                |
| Manuscript ID                 | bmjopen-2022-062409                                                                                                                                                                                                                                                                                                                                                                                                                                                                                                                                                                                                                                                                                                                                                                                                                                                                                                                                                                                                                                                                                                                                                                                                                                                                                                                                            |
| Article Type:                 | Original research                                                                                                                                                                                                                                                                                                                                                                                                                                                                                                                                                                                                                                                                                                                                                                                                                                                                                                                                                                                                                                                                                                                                                                                                                                                                                                                                              |
| Date Submitted by the Author: | 28-Feb-2022                                                                                                                                                                                                                                                                                                                                                                                                                                                                                                                                                                                                                                                                                                                                                                                                                                                                                                                                                                                                                                                                                                                                                                                                                                                                                                                                                    |
| Complete List of Authors:     | Melov, Sarah; Westmead Hospital, Westmead Institute for Maternal & Fetal Medicine; The University of Sydney, Reproduction and Perinatal Centre, Faculty of Medicine and Health<br>Elhindi, James; The University of Sydney, Reproduction and Perinatal Centre, Faculty of Medicine and Health<br>McGee, Therese; Westmead Hospital, Women's and Newborn Health; The University of Sydney, Faculty of Medicine and Health<br>Lee, Vincent; Westmead Hospital, Renal Medicine; The University of Sydney, Faculty of Medicine and Health<br>Cheung, N Wah; The University of Sydney, Westmead Applied Research Centre, Faculty of Medicine and Health; Westmead Hospital, Department of Diabetes & Endocrinology<br>Chua, Seng Chai; Westmead Hospital, Women's and Newborn Health<br>McNab, Justin; University of Sydney, Faculty of Health Sciences; The University of Sydney, Reproduction and Perinatal Centre, Faculty of Medicine and Health<br>Alahakoon, Thushari I; The University of Sydney, Faculty of Medicine and Health; Westmead Hospital, Westmead Institute for Maternal and Fetal Medicine, Women's and Newborn Health<br>Pasupathy, Dharmintra; The University of Sydney, Reproduction and Perinatal Centre, Faculty of Medicine and Health; Westmead Hospital, Westmead Institute for Maternal and Fetal Medicine, Women's and Newborn Health |
| Keywords:                     | COVID-19, PERINATOLOGY, OBSTETRICS, Maternal medicine < OBSTETRICS, Fetal medicine < OBSTETRICS, PUBLIC HEALTH                                                                                                                                                                                                                                                                                                                                                                                                                                                                                                                                                                                                                                                                                                                                                                                                                                                                                                                                                                                                                                                                                                                                                                                                                                                 |

SCHOLARONE™  
Manuscripts

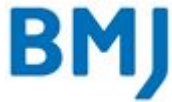

I, the Submitting Author has the right to grant and does grant on behalf of all authors of the Work (as defined in the below author licence), an exclusive licence and/or a non-exclusive licence for contributions from authors who are: i) UK Crown employees; ii) where BMJ has agreed a CC-BY licence shall apply, and/or iii) in accordance with the terms applicable for US Federal Government officers or employees acting as part of their official duties; on a worldwide, perpetual, irrevocable, royalty-free basis to BMJ Publishing Group Ltd ("BMJ") its licensees and where the relevant Journal is co-owned by BMJ to the co-owners of the Journal, to publish the Work in this journal and any other BMJ products and to exploit all rights, as set out in our [licence](#).

The Submitting Author accepts and understands that any supply made under these terms is made by BMJ to the Submitting Author unless you are acting as an employee on behalf of your employer or a postgraduate student of an affiliated institution which is paying any applicable article publishing charge ("APC") for Open Access articles. Where the Submitting Author wishes to make the Work available on an Open Access basis (and intends to pay the relevant APC), the terms of reuse of such Open Access shall be governed by a Creative Commons licence – details of these licences and which [Creative Commons](#) licence will apply to this Work are set out in our licence referred to above.

Other than as permitted in any relevant BMJ Author's Self Archiving Policies, I confirm this Work has not been accepted for publication elsewhere, is not being considered for publication elsewhere and does not duplicate material already published. I confirm all authors consent to publication of this Work and authorise the granting of this licence.

1  
2  
3 **Investigating service delivery and perinatal outcomes during the low prevalence first year**  
4 **of COVID-19 in a multiethnic Australian population: a cohort study**  
5  
6

7 Melov SJ<sup>1,2</sup>, Elhindi J<sup>1</sup>, McGee T<sup>3,4</sup>, Lee VW<sup>4,5</sup>, Cheung NW<sup>6,7,8</sup>, Chua S<sup>3</sup>, McNab J<sup>1,4,8</sup>, Alahakoon  
8 TI<sup>2,4</sup>, Pasupathy D<sup>1,2</sup>  
9  
10  
11  
12  
13

14 <sup>1</sup>Reproduction and Perinatal Centre, Faculty of Medicine and Health, The University of Sydney, Sydney,  
15 Australia  
16

17 <sup>2</sup>Westmead Institute for Maternal and Fetal Medicine, Women's and Newborn Health, Westmead  
18 Hospital, Westmead, Australia  
19  
20

21 <sup>3</sup>Women's and Newborn Health, Westmead Hospital, Westmead, Australia  
22

23 <sup>4</sup>Faculty of Medicine and Health, The University of Sydney, Sydney, Australia  
24

25 <sup>5</sup>Department of Renal Medicine, Westmead Hospital, Westmead, Australia  
26

27 <sup>6</sup>Westmead Applied Research Centre, Faculty of Medicine and Health, The University of Sydney,  
28 Sydney, Australia  
29  
30

31 <sup>7</sup>Department of Diabetes & Endocrinology, Westmead Hospital, Westmead, Australia  
32

33 <sup>8</sup>Charles Perkins Centre, The University of Sydney, Sydney, Australia  
34  
35  
36  
37  
38  
39

40 Address for correspondence

41 Email: [sarah.melov@health.nsw.gov.au](mailto:sarah.melov@health.nsw.gov.au)  
42  
43  
44  
45  
46  
47  
48  
49  
50  
51  
52  
53  
54  
55  
56  
57  
58  
59  
60

## Abstract

**Objective** Investigate the impact of the COVID-19 pandemic on perinatal outcomes in an Australian high migrant and low COVID-19 prevalent population to identify if COVID-19 driven health service changes and societal influences impact obstetric and perinatal outcomes.

**Design** Retrospective cohort study with pre COVID-19 period 1st January 2018-31st January 2020, and first year of global COVID-19 period 1st February 2020–31st January 2021. Multivariate logistic regression analysis was conducted adjusting for confounders including age, socioeconomic status, gestation, parity, ethnicity and BMI.

**Setting** Obstetric population attending three public hospitals including a major tertiary referral centre in Western Sydney, Australia.

**Participants** Women who delivered with singleton pregnancies over 20 weeks gestation. Ethnically diverse women, 66% overseas born. There were 34 103 births in the district that met inclusion criteria: before COVID-19 n=23 722, during COVID-19 n=10 381.

**Main outcome measures** Induction of labour, vaginal delivery, preterm birth, small for gestational age (SGA), composite neonatal adverse outcome, and full breastfeeding at hospital discharge.

**Results** During the first year of COVID-19 there was no change for induction of labour (aOR 0.97; 95% CI 0.92-1.02, p=0.26) and a 19% reduction in vaginal births (aOR 0.81; 95% CI 0.77-0.86, p<0.001). During the COVID-19 period we found a 15% reduction in spontaneous preterm birth (aOR 0.85; 95% CI 0.75-0.97, p=0.02) as well as a 10% reduction in SGA infants at birth (aOR 0.90; 95% CI 0.82-0.99, p=0.02). Composite adverse neonatal outcomes were marginally higher (aOR 1.08; 95% CI 1.00-1.15, p=0.04) and full breastfeeding rates at hospital discharge reduced by 15% (aOR 0.85; 95% CI 0.80-0.90, p<0.001).

**Conclusion** Despite a low prevalence of COVID-19, both positive and adverse obstetric outcomes were observed that may be related to changes in service delivery and interaction with health care providers. Further research is suggested to understand the drivers for these changes.

Keywords: COVID-19, Breastfeeding, Coronavirus, Pandemic, Preterm birth

Word count: 3259

### Strengths and limitations of this study

- The analysis provides the opportunity to evaluate the indirect effects of COVID-19 against a background of low prevalence of COVID-19 in the community.
- The cohort comprised of a large ethnically diverse population with similar exposure of restriction experience and service delivery changes.
- Analysis for both iatrogenic and spontaneous preterm birth.
- Missing some COVID-19 related confounders is a limitation such as physical activity levels, prevalence of pregnancy population working from home, or missing planned overseas social support due to international border restrictions.
- A limitation of the study is multiple outcomes were compared however, our results are consistent with several other studies in different populations increasing the veracity of our findings.

### INTRODUCTION

In the beginning of 2020, non-pharmaceutical interventions to reduce the spread of COVID-19 led to great changes in society such as lockdowns, enforced movement and travel restrictions.<sup>1 2</sup> There were also many changes to medical and maternity care around the world that are well documented, impacting direct care and social support.<sup>3-6</sup> Initial concerns of the impact of COVID-19 infection on pregnant women focused research on pregnancy outcomes for women who were infected and results varied, findings included increased COVID-19 infection risk in ethnic minorities, and a rise in both preterm and caesarean births.<sup>7-10</sup> More recently perinatal research has assessed the indirect impact of the pandemic,<sup>11</sup> particularly the impact of lockdowns.<sup>12-14</sup> Indirect impact will vary significantly between countries and within country due to diverse drivers such as lockdown experiences, social distancing measures, COVID-19 prevalence, societal compliance, economic and healthcare access.<sup>4 6 15</sup>

Studies of the indirect effects of COVID-19 on pregnancy outcome have shown inconsistent results. A reduction in preterm birth in the general population during the pandemic has been reported by some

1  
2  
3 authors but not others.<sup>12 16-18</sup> Differences in study design and other factors have led some authors to  
4  
5 conclude that there is insufficient evidence to determine if preterm birth has been reduced during  
6  
7 COVID-19.<sup>19</sup>  
8  
9

10  
11 Maternity care in Australia during the first year of the pandemic in 2020, experienced a disparate range  
12  
13 of changes from very little to significant alterations in service delivery dependent on population and  
14  
15 perceived risk in the community.<sup>3</sup> Little evidence exists for the impact of societal and service changes  
16  
17 on a culturally diverse obstetric population who initially experienced minimal COVID-19 community  
18  
19 transmission, a short lockdown period but experienced significant obstetric service and societal changes  
20  
21 due to the pandemic.  
22  
23

24  
25  
26 In our study population, we hypothesise obstetric outcomes may have been impacted by the rapid  
27  
28 changes in hospital service delivery as they shifted focus during the pandemic from patient centred care  
29  
30 to preservation of service and staff.<sup>20</sup> Western Sydney with its multicultural population, is an ideal  
31  
32 environment to examine the indirect effects of the response to the pandemic on perinatal outcomes  
33  
34 given the setting of low COVID-19 case numbers at the time of the study, yet having considerable  
35  
36 preventative measures implemented in the region. We aim to identify pandemic-related morbidity in  
37  
38 our large multi-ethnic Australian population and uncover potential drivers for both improved and  
39  
40 adverse maternity care outcomes.  
41  
42  
43  
44  
45  
46  
47  
48  
49  
50  
51  
52  
53  
54  
55  
56  
57  
58  
59  
60

## METHODS

We conducted a retrospective cohort study using routinely collected obstetric, medical and administrative data for women seeking antenatal care in the Western Sydney Local Health District. We compared birth outcomes greater than or equal to 20 weeks of gestation in the two years prior to the COVID-19 pandemic to the first year of the COVID-19 pandemic. The study period is defined as pre COVID-19 1st January 2018 – 31st January 2020 to the first twelve months of the COVID-19 pandemic 1st February 2020 – 31st January 2021.

The state of New South Wales (NSW) has a population of approximately 8.2 million.<sup>21</sup> The three study hospitals serve a health district population of approximately one million people. A total of 39 pregnant women had a confirmed COVID-19 diagnosis in this state for the study period and fewer than 60 COVID-19 related deaths were recorded for the total population in NSW in the first year.<sup>22</sup> During the study period no pregnant women were admitted with COVID-19 to the study hospitals and the prevalence of COVID-19 in the local community was low (total 690 cases Supp Figure 1).<sup>23</sup>

The study period was determined by the time when public awareness grew in NSW of the impending pandemic with official government announcements and a sharp rise and dominance of media coverage concerning COVID-19 from early February 2020.<sup>24</sup> The study period was after the 30<sup>th</sup> January 2020 WHO announcement declaring 2019-nCoV virus (COVID-19) as a public health emergency of international concern.<sup>25</sup> Public health order restrictions commenced 16<sup>th</sup> March 2020 with restrictions on gathering of over 500 people in NSW to reduce the spread of COVID-19. The restrictions escalated on the 30<sup>th</sup> March 2020, to 'hard lockdown' issuing of public health orders "that a person must not, without reasonable excuse, leave the person's place of residence".<sup>25</sup> The restrictions were present for approximately 7 weeks easing 15<sup>th</sup> May, 2020.

The short hard lockdown in NSW, was primarily enforced in greater Sydney, accompanied by increased restrictions and COVID-safe practices including all health facilities women and their families accessed. The restrictions for local maternity services included hospital entrance screening of all patients, staff



1  
2  
3 and visitors including temperature checks, asking about recent travel and symptoms of COVID-19.  
4  
5 Within the antenatal service, there was also an introduction of telehealth for the Diabetes in Pregnancy  
6  
7 clinics, restrictions on visitors such as allowing only patients in waiting rooms, no support person during  
8  
9 ultrasound and only one support person with no changing-over in the birth unit. During this time there  
10  
11 were frequent changes to service delivery and some confusion regarding rules for patients reported by  
12  
13 staff at the tertiary referral study Hospital.<sup>20</sup>  
14  
15

16  
17  
18 Community activities returned to near normal by July 2020 in NSW, however international and state  
19  
20 borders continued to be disrupted with ongoing outbreaks emerging. Restrictions to visitors and other  
21  
22 COVID-19 risk mitigation policies remained present for the maternity services throughout the study  
23  
24 period. COVID-19 vaccinations were not available in Australia during the study period.  
25  
26

27  
28 Western Sydney Local Health District human research ethics committee provided ethical approval for  
29  
30 this study using deidentified routinely collected administrative data (WSLHD HREC QA2101-15).  
31  
32

### 33 34 **Definitions**

35  
36  
37 Routinely collected maternity data for singleton pregnancies greater than 20 weeks gestation was  
38  
39 retrieved from the electronic maternal database. Terminations of pregnancy were not included in the  
40  
41 database. Gestational age was determined and calculated in the electronic maternity system utilising the  
42  
43 rules: use of last menstrual period (LMP) if regular, date was amended after available early ultrasound  
44  
45 6 week - 13+6 weeks gestation. If ultrasound dating varies from LMP by more than 5 days, if irregular  
46  
47 or uncertain LMP then ultrasound expected date of delivery (EDD) was used.  
48  
49

50  
51  
52 Socioeconomic status (SES) in our study was derived from the postcode address of participants during  
53  
54 pregnancy as determined for that area by the last Australian census information (2016), informing the  
55  
56 Index of Relative Socioeconomic Disadvantage (IRSD). The index is based on households in that area  
57  
58 using information on variables that include income, English fluency, education and employment status.  
59  
60 A lower index score represents greater disadvantage.<sup>26</sup>

## Outcomes of interest

Outcomes of interest were selected based on literature review, state obstetric benchmarking outcomes and outcomes that plausibly may be impacted by service delivery changes. Literature has reported criteria changes in some healthcare setting for induction of labour and overall induction rates changing, therefore we included any induction via any method at all gestations in our outcomes of interest. We defined all vaginal births as one outcome inclusive of breech vaginal births. All preterm births were defined as less than 37 weeks gestation. Spontaneous preterm was defined as vaginal preterm births without an induction or caesarean section preterm births with a history of preterm labour. Iatrogenic preterm births were those initiated by care providers, defined as either a planned caesarean section with no preterm labour or an induction prior to 37 weeks gestation. Small for gestational age (SGA) is birth weight less than 10<sup>th</sup> centile assessed by the Fenton growth chart.<sup>27</sup> Combined adverse neonatal outcome included any of the following; stillbirth, admission to special care/neonatal intensive care (NICU), Apgar score under 7 at 5 minutes, or newborn resuscitation with intubation.

## Data analysis and statistical methods

Demographic and obstetric characteristics of women were compared before and during the first year of COVID-19 using the chi-squared, Fisher's exact, or t-test where appropriate. Univariate logistic regression was applied to each characteristic to estimate unadjusted odds ratios. Then, three adjusted models were devised and implemented using multivariate logistic regression. Model 1 adjusted for maternal age, socioeconomic status, gestational age (except for the preterm birth outcome), parity, ethnicity, BMI, smoking status and mental health status. Model 2 adjusted for model of pregnancy care and the variables from Model 1. Model 3 adjusted for additional covariates that are clinically relevant for specific outcomes. For the vaginal birth outcome, birthweight and induction of labour were added to the covariates from Models 1 and 2. For the preterm birth outcome, a composite gestational diabetes/hypertension variable was added to the covariates from Models 1 and 2. For the breastfeeding outcome, mode of delivery, length of stay <24 hours, and preterm birth were added to the covariates from Models 1 and 2. For each model, an adjusted odds ratio with a 95% confidence interval was reported. P values

1  
2  
3 less than 0.05 were considered statistically significant. The cohort was restricted to records with  
4 complete data on outcomes of interest. Missing indicator variables were utilised for covariates in the  
5 multivariate analyses. All statistical analyses were completed using Stata Special Edition Version 14.2  
6 (StataCorp).  
7  
8  
9  
10

### 11 **Patient public involvement statement**

12  
13  
14  
15 This retrospective cohort study had no patient public involve in the design or analysis or dissemination  
16 of results.  
17  
18  
19  
20  
21  
22  
23  
24  
25  
26  
27  
28  
29  
30  
31  
32  
33  
34  
35  
36  
37  
38  
39  
40  
41  
42  
43  
44  
45  
46  
47  
48  
49  
50  
51  
52  
53  
54  
55  
56  
57  
58  
59  
60

For peer review only

## RESULTS

### Baseline characteristics

There were 34 103 singleton births for the three district hospitals meeting inclusion criteria. The principle tertiary referral centre had the greatest number of births in the cohort (n=17 005; 49.9%), with the large secondary hospital comprising of 36.6% (n=12 467) of the cohort. The pre COVID-19 period had a total of 23 722 singleton births and during the first year of COVID-19 (period 1st February 2020–31st January 2021) there were 10 381 singleton births.

Women who birthed in the first year of COVID-19 were more likely to be Australian born (35.1% vs 32.9%), overweight or obese (45.8% vs 44.5%), under 35 years old (59.7% vs 50.6%), have a history of a mental illness (15% vs 13%), to present for their first comprehensive antenatal visit at <10 weeks gestation (80.8% vs 64.4%) and less likely to be privately insured (5.9% vs 6.9%) compared to the preceding two years (Table 1). Women were admitted antenatally less often (10.1% vs 12.1%) and women who elected to have an early discharge postpartum at <24 hours, were higher from 15.5% during the pre-COVID period to 19.1% in the first year of COVID-19. Other demographic and pregnancy characteristics are documented in Table 1.

### Pregnancy complications and outcomes

There were no differences in overall median gestation age at birth between the two time periods (Table 2). We did observe that the rate of preterm birth was lower during COVID-19 compared to the preceding period (7.2% vs 8.1%). We also observed a higher proportion of births at or after 41 weeks gestation during the first year of COVID-19 (10.0% vs 9.0%). We identified a reduction in all vaginal births (66.6% vs 69.6%) including reduced vaginal breech births (0.7% vs 0.9%). This corresponded with the caesarean section rate increasing during the first year of the COVID-19 pandemic (33.4% vs 30.5%) (Table 2). There was an overall higher rate of induction of labour (35.3% vs 29.9%) and a lower rate of SGA births (6.9% vs 7.8%). We found no change for adverse birth outcomes including for stillbirth (0.9% vs 1.0%) or admissions to special care/neonatal intensive care (16.8% vs 16.2%) (Table 2).

1  
2  
3 In adjusted analysis no difference was identified for labour inductions during the COVID-19 period  
4 compared to the pre-COVID period (aOR 0.97; 95% CI 0.92-1.02). There were 19% fewer vaginal  
5 births during the pandemic first year in our health district (aOR 0.81; 95% CI 0.77-0.86) (Table 3). The  
6 rate of spontaneous preterm births was reduced by 15% (aOR 0.85; 95% CI 0.78-0.95) and no change  
7 was found for iatrogenic preterm births (aOR 0.94; 95% CI 0.80-1.09) (Table 3). Adjusted models also  
8 uncovered a 10% reduction for SGA infants at birth during the COVID-19 period (aOR 0.90; 95% CI  
9 0.82-0.99). We found a marginal increase for a combined adverse neonatal outcome during the COVID-  
10 19 period (aOR 1.08; 95% CI 1.00-1.15) (Table 3).  
11  
12  
13  
14  
15  
16  
17  
18  
19  
20  
21  
22

23 In our study population, the first year of the pandemic impacted breastfeeding when compared to the  
24 previous two years. When adjusted for several confounders including birthweight, mode of delivery,  
25 and prematurity, we found a 15% reduction for women fully breastfeeding their infant at discharge  
26 (aOR 0.85; 95% CI 0.80-0.90) (Table 3). Interestingly, there was a higher rate during the COVID-19  
27 period in both breastfeeding within one hour (61.9% vs 60.5%,  $p=0.02$ ) after birth and maternal/infant  
28 skin to skin contact at birth (76.7% vs 69.4%,  $p=0.02$ ) (Table 2).  
29  
30  
31  
32  
33  
34  
35  
36  
37  
38  
39  
40  
41  
42  
43  
44  
45  
46  
47  
48  
49  
50  
51  
52  
53  
54  
55  
56  
57  
58  
59  
60

## DISCUSSION

In a health district with low COVID-19 prevalence but affected by public health measures and process changes to service delivery, we found no differences in the rate of induction of labour, a reduction in spontaneous preterm and SGA births with no change in iatrogenic preterm births during the first year of COVID-19. There was also a significant reduction in vaginal birth and women fully breastfeeding at hospital discharge during this period compared to the previous two years. We identified a marginal increase in the rate of severe adverse neonatal composite outcome.

A strength of the study is the population experienced similar exposure to COVID-19 restrictions and maternity care service delivery changes. The multiethnic population with an even distribution between SES quintiles strengthens the generalisability of our findings to other populations. There may have been other confounders we were not able to capture that may impact on obstetric outcomes such as level of physical activity. Potentially some women may have benefited from more time to exercise with associated reduced infection risk through exercise-mediated protective immune response<sup>28</sup>, while other women who felt unwell may have had the opportunity to rest at home.

It is difficult to capture individual responses to the threat of COVID-19 despite low prevalence in the community for this cohort. However, recent qualitative research at one study hospital found clinicians felt some groups of women benefited from the COVID-19 restrictions with less stress and protected family time. However, migrant women were seen to have experienced isolation and anxiety due to loss of significant practical and social support from overseas relatives unable to visit due to COVID-19 related international border closures.<sup>20 29</sup> The impact of the loss of expected support from relatives due to COVID-19 travel restrictions was not measured in our study and is a limitation.

Similar to other studies, we document a reduction in preterm birth.<sup>12 17 18 30</sup> The lack of delineation between iatrogenic and spontaneous preterm birth in some research has been an issue when comparing

1  
2  
3 results and attempts to identify potential drivers.<sup>19</sup> A strength of our study is we were able to present  
4 the data and identified that only spontaneous preterm birth was reduced for the study period. However  
5 recent updated preterm birth meta-analysis by Yang et al found in unadjusted analysis preterm birth  
6 was reduced for both spontaneous and iatrogenic only in single centre studies, but not in national  
7 studies.<sup>6</sup> Local district level data and population characteristics may have less variation in obstetric  
8 service delivery confounders and other factors that increase the uniformity of experience for women  
9 and may account for the difference between large national level data and some single centre research.  
10 Local, more granular data for obstetric outcomes during the COVID-19 pandemic may assist in  
11 understanding drivers for improved and adverse obstetric outcomes. Shah et al in a Canadian population  
12 study, found no reduction in preterm births however, they did demonstrate preterm birth variation over  
13 time and between districts.<sup>31</sup> Our study covers the complete first year of the pandemic, reducing the  
14 possibility of a result based on a chance normal short-term variation.  
15  
16  
17  
18  
19  
20  
21  
22  
23  
24  
25  
26  
27  
28  
29  
30  
31

32 It has been postulated that the causative mechanism for a reduction in preterm births during the  
33 COVID-19 period is reduced infection and maternal physical activity throughout lockdown.<sup>32</sup> In our  
34 population, these potential causative factors for a reduction in spontaneous preterm birth, may have  
35 existed in our health district during the short lockdown and likely persisted beyond the lockdown period.  
36 Some infection mitigation behaviours may have been driven by our high migrant population who  
37 received advice from overseas relatives in areas experiencing high rates of COVID-19. Encouraging  
38 suitable exercise<sup>28</sup> and simple hygiene measures such as appropriate hand washing, are public health  
39 measures that may reduce infection. Hand hygiene historically has been poorly done and with increased  
40 awareness and compliance, may assist with decreasing preterm births.<sup>33 34</sup>  
41  
42  
43  
44  
45  
46  
47  
48  
49  
50  
51  
52  
53

54 We found women were presenting earlier to their family doctors for a first pregnancy visit and referral  
55 to tertiary hospital care. This may have been due to anxiety about the pregnancy and the unknown risk  
56 of COVID-19 infection to a fetus. The benefits of this early health provider contact may be correct  
57  
58  
59  
60

1  
2  
3 dietary, provide opportunity for early aspirin prescription and other pregnancy care that may contribute  
4  
5 to some of the improved pregnancy outcomes including preterm birth for this cohort.  
6  
7  
8  
9

10  
11 Similar to our study, a prospective Italian study found a 28% reduction in full breastfeeding at discharge  
12  
13 in a region with high COVID-19 prevalence.<sup>35</sup> We identified that during the COVID-19 period there  
14  
15 was an improvement in practices that support breastfeeding immediately after birth; maternal-infant  
16  
17 skin to skin contact and breastfeeding within the first hour. Birth unit protocols changed during the  
18  
19 COVID-19 period, with only one support person allowed at the birth. The improvement in skin to skin  
20  
21 and breastfeeding in the first hour may potentially be due to midwives identifying that women were  
22  
23 feeling more isolated and provided more one-to-one support in the birth room improving these important  
24  
25 breastfeeding outcomes. There may be several factors that contribute to less exclusive breastfeeding at  
26  
27 discharge in our study despite adjustment which included time of postnatal stay. Due to reduced visitors,  
28  
29 women may have felt they needed to bring formula into the hospital in case they had difficulty with  
30  
31 breastfeeding, therefore it was available and more likely to be used. There may also have been reduced  
32  
33 opportunities for staff to provide postnatal breastfeeding support due to concerns of COVID-19  
34  
35 infection risk by both staff and patients, staffing shortages and increased staff workload during the  
36  
37 COVID-19 period. It is well acknowledged the introduction of formula and bottle feeding in the early  
38  
39 postnatal period has significant consequences for infant long-term health and reduces total length of  
40  
41 breastfeeding.<sup>36-38</sup> Providing adequate lactation support antenatally, at birth and postnatally with staff  
42  
43 shortages during the pandemic is problematic but important for both short-term and long-term metabolic  
44  
45 maternal and infant health.<sup>36 39 40</sup>  
46  
47  
48  
49  
50  
51

52  
53 Although recent literature has focused on the impact of COVID-19 disease and pregnancy, the indirect  
54  
55 impact of the world-wide pandemic may not be fully realised for many years. There is increasing  
56  
57 evidence of the impact of exposure to disasters including pandemics, on long term health consequences.  
58  
59 A recent systematic review concluded fetal and maternal exposure to natural disasters including  
60



1  
2  
3 pandemics resulted in increased cardiometabolic risk in both.<sup>41</sup> Understanding a pandemic population  
4 with a low prevalence of COVID-19 but subject to changes in maternity care and societal stress, may  
5 assist in future investigations of drivers for cardiometabolic health.  
6  
7  
8  
9  
10  
11  
12

### 13 **CONCLUSIONS**

14  
15 The benefit to women, their families and the community of reduced SGA and preterm birth is long  
16 lasting, the drivers for this change may be difficult to identify. However, the results from this study in  
17 a cohort primarily exposed only to COVID-19 related service and societal changes, provides unique  
18 opportunity to generate evidence of these changes on pregnancy complications. The significant  
19 reduction in breastfeeding at discharge may be more easily addressed now identified. Funding  
20 appropriate intervention strategies is imperative both in the antenatal and postnatal periods to improve  
21 breastfeeding outcomes. Revealing all drivers for obstetric changes during the pandemic may be  
22 difficult to ascertain, further research in this high migrant cohort with higher prevalence of COVID-19  
23 cases may reveal evidence for more specific drivers.  
24  
25  
26  
27  
28  
29  
30  
31  
32  
33  
34  
35  
36  
37  
38  
39  
40  
41  
42  
43  
44  
45  
46  
47  
48  
49  
50  
51  
52  
53  
54  
55  
56  
57  
58  
59  
60

### **Author contributions**

Study designed by SJM, TM, SC, TIA and DP. JE performed the statistical analysis. SJM interpreted the data and wrote the initial and final manuscript drafts with supervision from DP. Invaluable support was given by JE, TM, VWL, NWC, SC, JM, TIA and DP for final interpretation of findings, and critical revision of the article.

### **Competing interest statement**

All authors declare they have no conflicts of interest for the research presented in this manuscript.

### **Funding statement**

A two-year grant was awarded to SJ Melov by the Westmead Charitable Trust, Career Development Grant, no grant number is associated with this grant. Some funds from this grant were used to support this research: statistical analysis, publication costs. The funding body had no role in the study design, analysis or manuscript development.

### **Data sharing statement**

Institutional restrictions apply to the availability of these data, and so are not publicly available. Data are however available from the corresponding author upon reasonable request and with permission of WSLHD Human Research and Ethics Committee.

## References

1. Suryanarayanan P, Tsou CH, Poddar A, et al. AI-assisted tracking of worldwide non-pharmaceutical interventions for COVID-19. *Sci Data* 2021;**8**(1):94. doi: 10.1038/s41597-021-00878-y
2. Haug N, Geyrhofer L, Londei A, et al. Ranking the effectiveness of worldwide COVID-19 government interventions. *Nat Hum Behav* 2020;**4**(12):1303-12. doi: 10.1038/s41562-020-01009-0
3. Bradfield Z, Wynter K, Hauck Y, et al. Experiences of receiving and providing maternity care during the COVID-19 pandemic in Australia: A five-cohort cross-sectional comparison. *PLoS One* 2021;**16**(3):e0248488. doi: 10.1371/journal.pone.0248488
4. Cutler DM, Summers LH. The COVID-19 Pandemic and the \$16 Trillion Virus. *JAMA* 2020;**324**(15):1495-96. doi: 10.1001/jama.2020.19759
5. Pak A, Adegboye OA, Adekunle AI, et al. Economic Consequences of the COVID-19 Outbreak: the Need for Epidemic Preparedness. *Frontiers in Public Health* 2020;**8**(241) doi: 10.3389/fpubh.2020.00241
6. Yang J, D'Souza R, Kharrat A, et al. Coronavirus disease 2019 pandemic and pregnancy and neonatal outcomes in general population: A living systematic review and meta-analysis (updated Aug 14, 2021). *Acta Obstet Gynecol Scand* 2021 doi: 10.1111/aogs.14277
7. Acosta AM, Garg S, Pham H, et al. Racial and Ethnic Disparities in Rates of COVID-19–Associated Hospitalization, Intensive Care Unit Admission, and In-Hospital Death in the United States From March 2020 to February 2021. *JAMA Network Open* 2021;**4**(10):e2130479-e79. doi: 10.1001/jamanetworkopen.2021.30479
8. Agyemang C, Richters A, Jolani S, et al. Ethnic minority status as social determinant for COVID-19 infection, hospitalisation, severity, ICU admission and deaths in the early phase of the pandemic: a meta-analysis. *BMJ Global Health* 2021;**6**(11):e007433. doi: 10.1136/bmjgh-2021-007433
9. Matar R, Alrahmani L, Monzer N, et al. Clinical Presentation and Outcomes of Pregnant Women With Coronavirus Disease 2019: A Systematic Review and Meta-analysis. *Clin Infect Dis* 2021;**72**(3):521-33. doi: 10.1093/cid/ciaa828
10. Papapanou M, Papaioannou M, Petta A, et al. Maternal and Neonatal Characteristics and Outcomes of COVID-19 in Pregnancy: An Overview of Systematic Reviews. *Int J Environ Res Public Health* 2021;**18**(2) doi: 10.3390/ijerph18020596
11. Du M, Yang J, Han N, et al. Association between the COVID-19 pandemic and the risk for adverse pregnancy outcomes: a cohort study. *BMJ Open* 2021;**11**(2):e047900. doi: 10.1136/bmjopen-2020-047900
12. Been JV, Burgos Ochoa L, Bertens LCM, et al. Impact of COVID-19 mitigation measures on the incidence of preterm birth: a national quasi-experimental study. *The Lancet Public Health* 2020;**5**(11):e604-e11. doi: [https://doi.org/10.1016/S2468-2667\(20\)30223-1](https://doi.org/10.1016/S2468-2667(20)30223-1)
13. Gallo LA, Gallo TF, Borg DJ, et al. A decline in planned, but not spontaneous, preterm birth rates in a large Australian tertiary maternity centre during COVID-19 mitigation measures. *Aust N Z J Obstet Gynaecol*;n/a(n/a) doi: <https://doi.org/10.1111/ajo.13406>
14. Rolnik DL, Matheson A, Liu Y, et al. Impact of COVID-19 pandemic restrictions on pregnancy duration and outcome in Melbourne, Australia. *Ultrasound Obstet Gynecol* 2021;**58**(5):677-87. doi: <https://doi.org/10.1002/uog.23743>
15. Nam SH, Nam JH, Kwon CY. Comparison of the Mental Health Impact of COVID-19 on Vulnerable and Non-Vulnerable Groups: A Systematic Review and Meta-Analysis of Observational Studies. *Int J Environ Res Public Health* 2021;**18**(20) doi: 10.3390/ijerph182010830
16. Bian Z, Qu X, Ying H, et al. Are COVID-19 mitigation measures reducing preterm birth rate in China? *BMJ Glob Health* 2021;**6**(8) doi: 10.1136/bmjgh-2021-006359
17. Chmielewska B, Barratt I, Townsend R, et al. Effects of the COVID-19 pandemic on maternal and perinatal outcomes: a systematic review and meta-analysis. *Lancet Glob Health* 2021;**9**(6):e759-e72. doi: 10.1016/s2214-109x(21)00079-6

18. Kirchengast S, Hartmann B. Pregnancy Outcome during the First COVID 19 Lockdown in Vienna, Austria. *Int J Environ Res Public Health* 2021;**18**(7) doi: 10.3390/ijerph18073782
19. Goldenberg RL, McClure EM. Have Coronavirus Disease 2019 (COVID-19) Community Lockdowns Reduced Preterm Birth Rates? *Obstet Gynecol* 2021;**137**(3):399-402. doi: 10.1097/AOG.0000000000004302
20. Melov SJ, Galas N, Swain J, et al. Exploring the COVID-19 pandemic experience of maternity clinicians in a high migrant population and low COVID-19 prevalence country: a qualitative study. *Women and Birth* 2021 doi: <https://doi.org/10.1016/j.wombi.2021.10.011>
21. Key Facts about NSW; Available from: <https://www.nsw.gov.au/about-nsw/key-facts-about-nsw#toc-population>
22. NSW Government. COVID-19 weekly surveillance in NSW, Epidemiology week 4, Ending 30 January 2021; Available from: <https://www.health.nsw.gov.au/Infectious/covid-19/Documents/covid-19-surveillance-report-20210130.pdf>
23. NSW Government. NSW COVID-19 data; Available from: <https://data.nsw.gov.au>.
24. Nolan D, Hanna C, McGuinness K and McCallum K . Covering COVID-19: How Australian Media reported the Coronavirus pandemic in 2020. News & Media Research Centre, University of Canberra, 2021 DOI:10.25916/01t1-6649
25. World Health Organisation. Statement on the second meeting of the International Health Regulations (2005) Emergency Committee regarding the outbreak of novel coronavirus (2019-nCoV) 2020; Available from: [https://www.who.int/news/item/30-01-2020-statement-on-the-second-meeting-of-the-international-health-regulations-\(2005\)-emergency-committee-regarding-the-outbreak-of-novel-coronavirus-\(2019-ncov\)](https://www.who.int/news/item/30-01-2020-statement-on-the-second-meeting-of-the-international-health-regulations-(2005)-emergency-committee-regarding-the-outbreak-of-novel-coronavirus-(2019-ncov)).
26. Australian Bureau of Statistics. Census of Population and Housing: Socio-Economic Indexes for Areas (SEIFA), Australia, 2016 Canberra: Australian Government; 2018; Available from: <https://www.abs.gov.au/ausstats/abs@.nsf/Lookup/by%20Subject/2033.0.55.001~2016~Main%20Features~IRSD~19>
27. Fenton TR, Nasser R, Eliasziw M, et al. Validating the weight gain of preterm infants between the reference growth curve of the fetus and the term infant. *BMC Pediatr* 2013;**13**:92. doi: 10.1186/1471-2431-13-92
28. Scheffer DdL, Latini A. Exercise-induced immune system response: Anti-inflammatory status on peripheral and central organs. *Biochim Biophys Acta Mol Basis Dis* 2020;**1866**(10):165823-23. doi: 10.1016/j.bbdis.2020.165823
29. Melov SJ, Hitos K. Venous thromboembolism risk and postpartum lying-in: Acculturation of Indian and Chinese women. *Midwifery* 2018;**58**:13-18. doi: 10.1016/j.midw.2017.11.006
30. Einarsdóttir K, Swift EM, Zoega H. Changes in obstetric interventions and preterm birth during COVID-19: A nationwide study from Iceland. *Acta Obstet Gynecol Scand* 2021;**100**(10):1924-30. doi: <https://doi.org/10.1111/aogs.14231>
31. Shah PS, Ye XY, Yang J, et al. Preterm birth and stillbirth rates during the COVID-19 pandemic: a population-based cohort study. *CMAJ* 2021;**193**(30):E1164-e72. doi: 10.1503/cmaj.210081
32. Hedermann G, Hedley PL, Bækvad-Hansen M, et al. Danish premature birth rates during the COVID-19 lockdown. *Arch Dis Child Fetal Neonatal Ed* 2021;**106**(1):93-95. doi: 10.1136/archdischild-2020-319990
33. Freeman MC, Stocks ME, Cumming O, et al. Hygiene and health: systematic review of handwashing practices worldwide and update of health effects. *Trop Med Int Health* 2014;**19**(8):906-16. doi: 10.1111/tmi.12339
34. Wolf J, Johnston R, Freeman MC, et al. Handwashing with soap after potential faecal contact: global, regional and country estimates. *Int J Epidemiol* 2019;**48**(4):1204-18. doi: 10.1093/ije/dyy253
35. Latorre G, Martinelli D, Guida P, et al. Impact of COVID-19 pandemic lockdown on exclusive breastfeeding in non-infected mothers. *Int Breastfeed J* 2021;**16**(1):36. doi: 10.1186/s13006-021-00382-4

- 1  
2  
3 36. Victora CG, Bahl R, Barros AJ, et al. Breastfeeding in the 21st century: epidemiology,  
4 mechanisms, and lifelong effect. *Lancet* 2016;**387**(10017):475-90. doi: 10.1016/s0140-  
5 6736(15)01024-7  
6  
7 37. Ávila-Ortiz MN, Castro-Sánchez AE, Martínez-González EA, et al. Factors associated with  
8 abandoning exclusive breastfeeding in Mexican mothers at two private hospitals. *Int*  
9 *Breastfeed J* 2020;**15**(1):73. doi: 10.1186/s13006-020-00316-6  
10  
11 38. Batista CLC, Ribeiro VS, Nascimento M, et al. Association between pacifier use and bottle-feeding  
12 and unfavorable behaviors during breastfeeding. *J Pediatr (Rio J)* 2018;**94**(6):596-601. doi:  
13 10.1016/j.jped.2017.10.005  
14  
15 39. Melov SJ, White L, Simmons M, et al. The BLiING study - Breastfeeding length and intensity in  
16 gestational diabetes and metabolic effects in a subsequent pregnancy: A cohort study.  
17 *Midwifery* 2022;**107**:103262. doi: 10.1016/j.midw.2022.103262  
18  
19 40. Tschiderer L, Seekircher L, Kunutsor SK, et al. Breastfeeding Is Associated With a Reduced  
20 Maternal Cardiovascular Risk: Systematic Review and Meta-Analysis Involving Data From 8  
21 Studies and 1 192 700 Parous Women. *J Am Heart Assoc* 2022;**11**(2):e022746. doi:  
22 10.1161/jaha.121.022746  
23  
24 41. De Rubeis V, Lee J, Anwer MS, et al. Impact of disasters, including pandemics, on cardiometabolic  
25 outcomes across the life-course: a systematic review. *BMJ Open* 2021;**11**(5):e047152. doi:  
26 10.1136/bmjopen-2020-047152  
27  
28  
29  
30  
31  
32  
33  
34  
35  
36  
37  
38  
39  
40  
41  
42  
43  
44  
45  
46  
47  
48  
49  
50  
51  
52  
53  
54  
55  
56  
57  
58  
59  
60

**Table 1.** Women with a singleton pregnancy: maternal demographic characteristics and pregnancy outcomes first year of COVID-19 compared to pre-COVID in a NSW metropolitan health district  
Pre-COVID-19 = 1<sup>st</sup> January 2018 – 31<sup>st</sup> January 2020 COVID-19 = 1<sup>st</sup> February 2020 – Jan 31<sup>st</sup> 2021

| Characteristics                                      | Pre-COVID-19<br>n = 23,722<br>N (%) | COVID-19<br>n = 10,381<br>N (%) | P value |
|------------------------------------------------------|-------------------------------------|---------------------------------|---------|
| <b>Clinical &amp; demographic characteristics</b>    |                                     |                                 |         |
| Maternal age group years                             |                                     |                                 |         |
| <20                                                  | 38 (0.2)                            | 46 (0.4)                        | <0.001  |
| 20-24                                                | 614 (2.6)                           | 452 (3.1)                       |         |
| 25-34                                                | 11 335 (47.8)                       | 5 835 (56.2)                    |         |
| 35-39                                                | 8 939 (37.7)                        | 3 335 (32.1)                    |         |
| >39                                                  | 2 796 (11.8)                        | 713 (6.9)                       |         |
| Ethnicity                                            |                                     |                                 |         |
| South Asian                                          | 6047 (25.5)                         | 2 950 (28.4)                    | <0.001  |
| Caucasian/European                                   | 3 307 (13.9)                        | 1 886 (18.1)                    |         |
| South-East Asian                                     | 3249 (13.7)                         | 1 357 (13.1)                    |         |
| Middle Eastern                                       | 8116 (34.2)                         | 3827 (36.9)                     |         |
| Aboriginal Torres Strait Islander                    | 338 (1.4)                           | 188 (1.8)                       |         |
| Unknown/missing <sup>s</sup>                         | 2665 (11.2)                         | 173 (1.7)                       |         |
| Australian born                                      | 7 809 (32.9)                        | 3 648 (35.1)                    | <0.001  |
| SES disadvantage                                     |                                     |                                 |         |
| Quintile 1 (most disadvantaged)                      | 5 367 (22.7)                        | 2 361 (22.8)                    | 0.04    |
| Quintile 2                                           | 5 721 (24.1)                        | 2 568 (24.8)                    |         |
| Quintile 3                                           | 3 508 (14.8)                        | 1 494 (14.4)                    |         |
| Quintile 4                                           | 3 291 (13.9)                        | 1 528 (14.7)                    |         |
| Quintile 5 (least disadvantaged)                     | 5 809 (24.6)                        | 2 416 (23.3)                    |         |
| BMI (kg/m <sup>2</sup> ) at booking                  |                                     |                                 |         |
| <18.50                                               | 1 116 (4.7)                         | 417 (4.5)                       | 0.02    |
| 18.5–24.9                                            | 11 981 (50.5)                       | 5 207 (50.2)                    |         |
| 25.0–29.9                                            | 6 317 (26.3)                        | 2 875 (27.3)                    |         |
| ≥30.0                                                | 4 308 (18.2)                        | 1 922 (18.5)                    |         |
| Nulliparous                                          | 10 331 (43.6)                       | 4 475 (43.1)                    | 0.45    |
| Assisted conception                                  | 1 050 (4.4)                         | 471 (4.5)                       | 0.65    |
| Current smoking at booking                           | 1 380 (5.8)                         | 619 (6.0)                       | 0.60    |
| Disclosed domestic violence                          | 340 (1.5)                           | 141 (1.5)                       | 0.69    |
| Diagnosed mental illness                             | 3 083 (13.0)                        | 1 552 (15.0)                    | <0.001  |
| History of hypertension                              | 844 (3.6)                           | 327 (3.2)                       | 0.06    |
| History of diabetes (T1DM T2DM)                      | 265 (1.3)                           | 114 (1.3)                       | 0.93    |
| History of gestational diabetes                      | 1,555 (6.6)                         | 738 (7.1)                       | 0.06    |
| <b>Health service characteristics</b>                |                                     |                                 |         |
| < 10 weeks gestation first comprehensive assessment  | 15,221 (64.4)                       | 8,360 (80.8)                    | <0.001  |
| Model of care                                        |                                     |                                 |         |
| Low risk hospital                                    | 15,210 (64.1)                       | 6,768 (65.2)                    | 0.00    |
| Hospital complex medical                             | 6 775 (28.6)                        | 3,096 (29.4)                    |         |
| Private maternity                                    | 1 635 (6.9)                         | 611 (5.9)                       |         |
| No antenatal care                                    | 102 (0.4)                           | 38 (0.4)                        |         |
| Antenatal admission to hospital                      | 2 863 (12.1)                        | 1 044 (10.1)                    | <0.001  |
| Postnatal maternal length of stay < one day          | 3 674 (15.5)                        | 2 000 (19.1)                    | <0.001  |
| Postnatal maternal length of stay (days, median IQR) | 2.02 (1.51)                         | 2.00 (1.68)                     | <0.001  |

SES = Socio Economic Status (Index of Relative Socio-economic Disadvantage)

1  
2  
3 Low risk hospital: Midwifery care and shared antenatal care (General Practitioner/family doctor); Hospital  
4 complex medical care: Hospital based medical and high-risk clinic; Private maternity care: Obstetrician &  
5 privately practicing midwife  
6 § missing due to ethnicity as routine collection introduced mid-2018  
7  
8  
9  
10  
11  
12  
13  
14  
15  
16  
17  
18  
19  
20  
21  
22  
23  
24  
25  
26  
27  
28  
29  
30  
31  
32  
33  
34  
35  
36  
37  
38  
39  
40  
41  
42  
43  
44  
45  
46  
47  
48  
49  
50  
51  
52  
53  
54  
55  
56  
57  
58  
59  
60

For peer review only

**Table 2.** Pregnancy outcomes in a low-prevalence COVID-19 high-migrant Australian urban population:

| Pre-COVID = 1 <sup>st</sup> January 2018 – 31 <sup>st</sup> January 2020 |                                          | COVID-19 = 1 <sup>st</sup> February 2020 – Jan 31 <sup>st</sup> 2021 |                          |
|--------------------------------------------------------------------------|------------------------------------------|----------------------------------------------------------------------|--------------------------|
| <b>Pregnancy complications</b>                                           | <b>Pre-COVID-19</b><br>N=23 722<br>N (%) | <b>COVID-19</b><br>n = 10 381<br>N (%)                               | <b>P</b><br><b>value</b> |
| <b>Timing of birth</b>                                                   |                                          |                                                                      |                          |
| Gestational age (weeks) median (IQR)                                     | 39.2 (1.8)                               | 39.2 (1.8)                                                           | 0.25                     |
| <28 weeks                                                                | 301 (1.3)                                | 128 (1.2)                                                            | <0.001                   |
| 28-32 weeks                                                              | 232 (1.0)                                | 84 (0.8)                                                             |                          |
| <37 weeks                                                                | 1 439 (6.1)                              | 539 (5.2)                                                            |                          |
| 37+ weeks                                                                | 21 748 (91.7)                            | 9 630 (92.8)                                                         |                          |
| <b>Mode of delivery</b>                                                  |                                          |                                                                      |                          |
| Vaginal birth                                                            | 13 931 (58.8)                            | 5 819 (56.1)                                                         | <0.001                   |
| Instrumental                                                             | 2 340 (9.9)                              | 1 016 (9.8)                                                          |                          |
| Vaginal breech                                                           | 204 (0.9)                                | 76 (0.7)                                                             |                          |
| Caesarean section                                                        | 7 224 (30.5)                             | 3 465 (33.4)                                                         |                          |
| <b>Onset of labour</b>                                                   |                                          |                                                                      |                          |
| Induction                                                                | 7 095 (29.9)                             | 3 666 (35.3)                                                         | <0.001                   |
| <b>Birth weight</b>                                                      |                                          |                                                                      |                          |
| Appropriate for gestational age                                          | 20 071 (85.1)                            | 28 884 (85.5)                                                        | 0.39                     |
| Large for gestational age                                                | 1 676 (7.1)                              | 784 (7.6)                                                            | 0.11                     |
| Small for gestational age                                                | 1 832 (7.8)                              | 713 (6.9)                                                            | 0.01                     |
| <b>Adverse birth outcomes</b>                                            |                                          |                                                                      |                          |
| Stillbirth                                                               | 227 (1.0)                                | 95 (0.9)                                                             | 0.71                     |
| Apgar <7 at 5mins                                                        | 662 (2.8)                                | 257 (2.5)                                                            | 0.10                     |
| Intubation resuscitation at birth                                        | 262 (1.1)                                | 100 (1.0)                                                            | 0.24                     |
| Admission to NICU                                                        | 3 851 (16.2)                             | 1 743 (16.8)                                                         | 0.23                     |
| <b>Neonatal feeding</b>                                                  |                                          |                                                                      |                          |
| Skin to skin at birth                                                    | 16 454 (69.4)                            | 7 961 (76.7)                                                         | 0.02                     |
| Feeding within 1 hour                                                    | 14 353 (60.5)                            | 6 424 (61.9)                                                         | 0.02                     |
| Fully breastfeeding at discharge                                         | 15 620 (65.8)                            | 6 410 (62.1)                                                         | <0.001                   |



**Table 3.**

Odds ratio for maternal and neonatal pregnancy outcomes during the first year of COVID-19 compared to the previous two years in an Australian metropolitan health district  
 COVID = 1st February 2020 – Jan 31st 2021(n=10 381) Pre-COVID = 1st January 2018 – 31st January 2020 (n=23 722)

| Outcome                                  | Sample Size | Unadj. OR           | P      | Model 1 OR          | P      | Model 2 OR          | P      | Model 3 OR          | P      |
|------------------------------------------|-------------|---------------------|--------|---------------------|--------|---------------------|--------|---------------------|--------|
| Induction of labour                      | 34,082      | 0.90<br>(0.86,0.94) | <0.001 | 0.97<br>(0.92,1.02) | 0.30   | 0.97<br>(0.92,1.02) | 0.26   | -                   | -      |
| Vaginal birth                            | 34,065      | 0.89<br>(0.85,0.93) | <0.001 | 0.82<br>(0.78,0.86) | <0.001 | 0.82<br>(0.78,0.86) | <0.001 | 0.81<br>(0.77,0.86) | <0.001 |
| Preterm birth                            | 34,080      | 0.86<br>(0.79,0.94) | 0.00   | 0.91<br>(0.83,0.99) | 0.05   | 0.91<br>(0.83,0.99) | 0.03   | 0.88<br>(0.80,0.97) | 0.01   |
| Spontaneous preterm birth                | 34,080      | 0.76<br>(0.67,0.85) | <0.001 | 0.88<br>(0.77,0.99) | 0.04   | 0.88<br>(0.77,0.99) | 0.04   | 0.85<br>(0.75,0.97) | 0.02   |
| Small for gestational age at birth       | 33,880      | 0.88<br>(0.81,0.96) | 0.01   | 0.90<br>(0.82,0.99) | 0.03   | 0.90<br>(0.82,0.99) | 0.02   | -                   | -      |
| Composite adverse neonatal outcome       | 33,632      | 1.03<br>(0.97,1.09) | 0.38   | 1.08<br>(1.00,1.15) | 0.03   | 1.08<br>(1.00,1.15) | 0.04   | -                   | -      |
| Full breastfeeding at hospital discharge | 31,113      | 0.86<br>(0.81,0.90) | <0.001 | 0.85<br>(0.80,0.90) | <0.001 | 0.85<br>(0.81,0.90) | <0.001 | 0.85<br>(0.80,0.90) | <0.001 |

Composite adverse neonatal includes any: stillbirth, admission to NICU, Apgar score under 7 at 5 minutes, or newborn resuscitation with intubation.

**Variables adjusted for in each model:**

**Model 1:** Includes maternal age, Socioeconomic status SEIFA disadvantage quintile, gestational age, parity, ethnicity, BMI (numeric), smoking status, and mental health status.

**Model 2:** Model 1 variables and model of pregnancy care variable.

For preterm birth outcome the models are not adjusted for gestational age.

**Model 3:** Includes Model 1 and 2 covariates and additional covariates as listed below.

Vaginal birth: birthweight and induction of labour.

Preterm birth: composite maternal complications variable (gestational diabetes or hypertensive disorders of pregnancy).

Breastfeeding: birthweight, mode of delivery, length of stay <24 hours and gestational age/preterm.

**Supplementary Figure 1**

Total COVID-19 cases during study period 1st Feb 2020 – Jan 31<sup>st</sup> 2021 Western Sydney Local Health District, NSW Australia; total cases 632 (open source data <https://data.nsw.gov.au>)

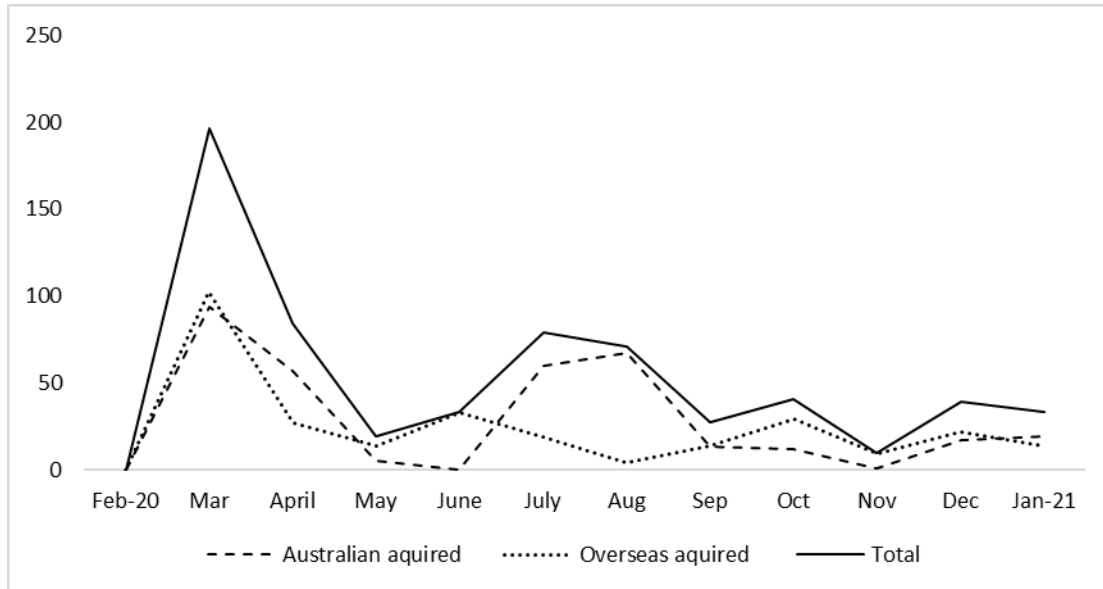

For peer review only

STROBE Statement—Checklist of items that should be included in reports of *cohort studies*

|                              | Item No | Recommendation                                                                                                                                                                                    | Page No           |
|------------------------------|---------|---------------------------------------------------------------------------------------------------------------------------------------------------------------------------------------------------|-------------------|
| <b>Title and abstract</b>    | 1       | (a) Indicate the study's design with a commonly used term in the title or the abstract                                                                                                            | ✓<br>1            |
|                              |         | (b) Provide in the abstract an informative and balanced summary of what was done and what was found                                                                                               | ✓<br>2            |
| <b>Introduction</b>          |         |                                                                                                                                                                                                   |                   |
| Background/rationale         | 2       | Explain the scientific background and rationale for the investigation being reported                                                                                                              | ✓<br>4-5          |
| Objectives                   | 3       | State specific objectives, including any prespecified hypotheses                                                                                                                                  | ✓<br>4-5          |
| <b>Methods</b>               |         |                                                                                                                                                                                                   |                   |
| Study design                 | 4       | Present key elements of study design early in the paper                                                                                                                                           | ✓<br>6            |
| Setting                      | 5       | Describe the setting, locations, and relevant dates, including periods of recruitment, exposure, follow-up, and data collection                                                                   | ✓<br>6-7          |
| Participants                 | 6       | (a) Give the eligibility criteria, and the sources and methods of selection of participants. Describe methods of follow-up                                                                        | ✓<br>7-8          |
|                              |         | (b) For matched studies, give matching criteria and number of exposed and unexposed                                                                                                               | -                 |
| Variables                    | 7       | Clearly define all outcomes, exposures, predictors, potential confounders, and effect modifiers. Give diagnostic criteria, if applicable                                                          | ✓<br>7-8          |
| Data sources/<br>measurement | 8*      | For each variable of interest, give sources of data and details of methods of assessment (measurement). Describe comparability of assessment methods if there is more than one group              | ✓<br>6-8          |
| Bias                         | 9       | Describe any efforts to address potential sources of bias                                                                                                                                         | ✓<br>6-7          |
| Study size                   | 10      | Explain how the study size was arrived at                                                                                                                                                         | ✓<br>6-7          |
| Quantitative variables       | 11      | Explain how quantitative variables were handled in the analyses. If applicable, describe which groupings were chosen and why                                                                      | ✓<br>6-8          |
| Statistical methods          | 12      | (a) Describe all statistical methods, including those used to control for confounding                                                                                                             | ✓<br>8-9          |
|                              |         | (b) Describe any methods used to examine subgroups and interactions                                                                                                                               | ✓<br>8-9          |
|                              |         | (c) Explain how missing data were addressed                                                                                                                                                       | ✓<br>9            |
|                              |         | (d) If applicable, explain how loss to follow-up was addressed                                                                                                                                    | -                 |
|                              |         | (e) Describe any sensitivity analyses                                                                                                                                                             | -                 |
| <b>Results</b>               |         |                                                                                                                                                                                                   |                   |
| Participants                 | 13*     | (a) Report numbers of individuals at each stage of study—eg numbers potentially eligible, examined for eligibility, confirmed eligible, included in the study, completing follow-up, and analysed | ✓<br>10<br>Tables |
|                              |         | (b) Give reasons for non-participation at each stage                                                                                                                                              | ✓<br>10<br>Tables |
|                              |         | (c) Consider use of a flow diagram                                                                                                                                                                | -                 |
| Descriptive data             | 14*     | (a) Give characteristics of study participants (eg demographic, clinical, social) and information on exposures and potential confounders                                                          | ✓<br>10<br>Tables |

1  
2  
3  
4  
5  
6  
7  
8  
9  
10  
11  
12  
13  
14  
15  
16  
17  
18  
19  
20  
21  
22  
23  
24  
25  
26  
27  
28  
29  
30  
31  
32  
33  
34  
35  
36  
37  
38  
39  
40  
41  
42  
43  
44  
45  
46  
47  
48  
49  
50  
51  
52  
53  
54  
55  
56  
57  
58  
59  
60

|              |     |                                                                                     |                      |
|--------------|-----|-------------------------------------------------------------------------------------|----------------------|
|              |     | (b) Indicate number of participants with missing data for each variable of interest | ✓<br>tables          |
|              |     | (c) Summarise follow-up time (eg, average and total amount)                         | -                    |
| Outcome data | 15* | Report numbers of outcome events or summary measures over time                      | ✓<br>10-11<br>Tables |

For peer review only

|    |                          |    |                                                                                                                                                                                                              |                   |
|----|--------------------------|----|--------------------------------------------------------------------------------------------------------------------------------------------------------------------------------------------------------------|-------------------|
| 1  | Main results             | 16 | (a) Give unadjusted estimates and, if applicable, confounder-adjusted estimates and their precision (eg, 95% confidence interval). Make clear which confounders were adjusted for and why they were included | ✓<br>Tables 10-11 |
| 2  |                          |    | (b) Report category boundaries when continuous variables were categorized                                                                                                                                    |                   |
| 3  |                          |    | (c) If relevant, consider translating estimates of relative risk into absolute risk for a meaningful time period                                                                                             |                   |
| 4  |                          |    |                                                                                                                                                                                                              |                   |
| 5  |                          |    |                                                                                                                                                                                                              |                   |
| 6  |                          |    |                                                                                                                                                                                                              |                   |
| 7  |                          |    |                                                                                                                                                                                                              |                   |
| 8  |                          |    |                                                                                                                                                                                                              |                   |
| 9  | Other analyses           | 17 | Report other analyses done—eg analyses of subgroups and interactions, and sensitivity analyses                                                                                                               | ✓<br>Tables 10-11 |
| 10 |                          |    |                                                                                                                                                                                                              |                   |
| 11 |                          |    |                                                                                                                                                                                                              |                   |
| 12 | <b>Discussion</b>        |    |                                                                                                                                                                                                              |                   |
| 13 | Key results              | 18 | Summarise key results with reference to study objectives                                                                                                                                                     | ✓<br>12           |
| 14 |                          |    |                                                                                                                                                                                                              |                   |
| 15 | Limitations              | 19 | Discuss limitations of the study, taking into account sources of potential bias or imprecision. Discuss both direction and magnitude of any potential bias                                                   | ✓<br>12-13        |
| 16 |                          |    |                                                                                                                                                                                                              |                   |
| 17 | Interpretation           | 20 | Give a cautious overall interpretation of results considering objectives, limitations, multiplicity of analyses, results from similar studies, and other relevant evidence                                   | ✓<br>13-15        |
| 18 |                          |    |                                                                                                                                                                                                              |                   |
| 19 |                          |    |                                                                                                                                                                                                              |                   |
| 20 | Generalisability         | 21 | Discuss the generalisability (external validity) of the study results                                                                                                                                        | ✓<br>14-15        |
| 21 |                          |    |                                                                                                                                                                                                              |                   |
| 22 | <b>Other information</b> |    |                                                                                                                                                                                                              |                   |
| 23 | Funding                  | 22 | Give the source of funding and the role of the funders for the present study and, if applicable, for the original study on which the present article is based                                                | ✓<br>3            |
| 24 |                          |    |                                                                                                                                                                                                              |                   |
| 25 |                          |    |                                                                                                                                                                                                              |                   |
| 26 |                          |    |                                                                                                                                                                                                              |                   |

27 \*Give information separately for exposed and unexposed groups.

28  
29  
30 **Note:** An Explanation and Elaboration article discusses each checklist item and gives methodological background and published examples of transparent reporting. The STROBE checklist is best used in conjunction with this article (freely available on the Web sites of PLoS Medicine at <http://www.plosmedicine.org/>, Annals of Internal Medicine at <http://www.annals.org/>, and Epidemiology at <http://www.epidem.com/>). Information on the STROBE Initiative is available at <http://www.strobe-statement.org>.

31  
32  
33  
34  
35  
36  
37  
38  
39  
40  
41  
42  
43  
44  
45  
46  
47  
48  
49  
50  
51  
52  
53  
54  
55  
56  
57  
58  
59  
60

# BMJ Open

## Investigating service delivery and perinatal outcomes during the low prevalence first year of COVID-19 in a multiethnic Australian population: a cohort study

|                                 |                                                                                                                                                                                                                                                                                                                                                                                                                                                                                                                                                                                                                                                                                                                                                                                                                                                                                                                                                                                                                                                                                                                                                                                                                                                                                                                                                                   |
|---------------------------------|-------------------------------------------------------------------------------------------------------------------------------------------------------------------------------------------------------------------------------------------------------------------------------------------------------------------------------------------------------------------------------------------------------------------------------------------------------------------------------------------------------------------------------------------------------------------------------------------------------------------------------------------------------------------------------------------------------------------------------------------------------------------------------------------------------------------------------------------------------------------------------------------------------------------------------------------------------------------------------------------------------------------------------------------------------------------------------------------------------------------------------------------------------------------------------------------------------------------------------------------------------------------------------------------------------------------------------------------------------------------|
| Journal:                        | <i>BMJ Open</i>                                                                                                                                                                                                                                                                                                                                                                                                                                                                                                                                                                                                                                                                                                                                                                                                                                                                                                                                                                                                                                                                                                                                                                                                                                                                                                                                                   |
| Manuscript ID                   | bmjopen-2022-062409.R1                                                                                                                                                                                                                                                                                                                                                                                                                                                                                                                                                                                                                                                                                                                                                                                                                                                                                                                                                                                                                                                                                                                                                                                                                                                                                                                                            |
| Article Type:                   | Original research                                                                                                                                                                                                                                                                                                                                                                                                                                                                                                                                                                                                                                                                                                                                                                                                                                                                                                                                                                                                                                                                                                                                                                                                                                                                                                                                                 |
| Date Submitted by the Author:   | 28-May-2022                                                                                                                                                                                                                                                                                                                                                                                                                                                                                                                                                                                                                                                                                                                                                                                                                                                                                                                                                                                                                                                                                                                                                                                                                                                                                                                                                       |
| Complete List of Authors:       | Melov, Sarah; Westmead Hospital, Westmead Institute for Maternal & Fetal Medicine; The University of Sydney, Reproduction and Perinatal Centre, Faculty of Medicine and Health<br>Elhindi , James; The University of Sydney, Reproduction and Perinatal Centre, Faculty of Medicine and Health<br>McGee, Therese ; Westmead Hospital, Women's and Newborn Health; The University of Sydney, Faculty of Medicine and Health<br>Lee, Vincent; Westmead Hospital, Renal Medicine; The University of Sydney, Faculty of Medicine and Health<br>Cheung, N Wah; The University of Sydney, Westmead Applied Research Centre, Faculty of Medicine and Health; Westmead Hospital, Department of Diabetes & Endocrinology<br>Chua, Seng Chai ; Westmead Hospital, Women's and Newborn Health<br>McNab, Justin; University of Sydney, Faculty of Health Sciences; The University of Sydney, Reproduction and Perinatal Centre, Faculty of Medicine and Health<br>Alahakoon, Thushari I; The University of Sydney, Faculty of Medicine and Health; Westmead Hospital, Westmead Institute for Maternal and Fetal Medicine, Women's and Newborn Health<br>Pasupathy, Dharmintra; The University of Sydney, Reproduction and Perinatal Centre, Faculty of Medicine and Health; Westmead Hospital, Westmead Institute for Maternal and Fetal Medicine, Women's and Newborn Health |
| <b>Primary Subject Heading</b>: | Obstetrics and gynaecology                                                                                                                                                                                                                                                                                                                                                                                                                                                                                                                                                                                                                                                                                                                                                                                                                                                                                                                                                                                                                                                                                                                                                                                                                                                                                                                                        |
| Secondary Subject Heading:      | Epidemiology                                                                                                                                                                                                                                                                                                                                                                                                                                                                                                                                                                                                                                                                                                                                                                                                                                                                                                                                                                                                                                                                                                                                                                                                                                                                                                                                                      |
| Keywords:                       | COVID-19, PERINATOLOGY, OBSTETRICS, Maternal medicine < OBSTETRICS, Fetal medicine < OBSTETRICS, PUBLIC HEALTH                                                                                                                                                                                                                                                                                                                                                                                                                                                                                                                                                                                                                                                                                                                                                                                                                                                                                                                                                                                                                                                                                                                                                                                                                                                    |
|                                 |                                                                                                                                                                                                                                                                                                                                                                                                                                                                                                                                                                                                                                                                                                                                                                                                                                                                                                                                                                                                                                                                                                                                                                                                                                                                                                                                                                   |

SCHOLARONE™  
Manuscripts

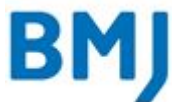

I, the Submitting Author has the right to grant and does grant on behalf of all authors of the Work (as defined in the below author licence), an exclusive licence and/or a non-exclusive licence for contributions from authors who are: i) UK Crown employees; ii) where BMJ has agreed a CC-BY licence shall apply, and/or iii) in accordance with the terms applicable for US Federal Government officers or employees acting as part of their official duties; on a worldwide, perpetual, irrevocable, royalty-free basis to BMJ Publishing Group Ltd ("BMJ") its licensees and where the relevant Journal is co-owned by BMJ to the co-owners of the Journal, to publish the Work in this journal and any other BMJ products and to exploit all rights, as set out in our [licence](#).

The Submitting Author accepts and understands that any supply made under these terms is made by BMJ to the Submitting Author unless you are acting as an employee on behalf of your employer or a postgraduate student of an affiliated institution which is paying any applicable article publishing charge ("APC") for Open Access articles. Where the Submitting Author wishes to make the Work available on an Open Access basis (and intends to pay the relevant APC), the terms of reuse of such Open Access shall be governed by a Creative Commons licence – details of these licences and which [Creative Commons](#) licence will apply to this Work are set out in our licence referred to above.

Other than as permitted in any relevant BMJ Author's Self Archiving Policies, I confirm this Work has not been accepted for publication elsewhere, is not being considered for publication elsewhere and does not duplicate material already published. I confirm all authors consent to publication of this Work and authorise the granting of this licence.

1  
2  
3 **Investigating service delivery and perinatal outcomes during the low prevalence first year**  
4 **of COVID-19 in a multiethnic Australian population: a cohort study**  
5  
6

7 Melov SJ<sup>1,2</sup>, Elhindi J<sup>1</sup>, McGee T<sup>3,4</sup>, Lee VW<sup>4,5</sup>, Cheung NW<sup>6,7,8</sup>, Chua S<sup>3</sup>, McNab J<sup>1,4,8</sup>, Alahakoon TI<sup>2,4</sup>,  
8  
9 Pasupathy D<sup>1,2</sup>  
10

11  
12  
13 <sup>1</sup>Reproduction and Perinatal Centre, Faculty of Medicine and Health, The University of Sydney, Sydney,  
14  
15 Australia  
16

17 <sup>2</sup>Westmead Institute for Maternal and Fetal Medicine, Women's and Newborn Health, Westmead  
18  
19 Hospital, Westmead, Australia  
20

21 <sup>3</sup>Women's and Newborn Health, Westmead Hospital, Westmead, Australia  
22

23 <sup>4</sup>Faculty of Medicine and Health, The University of Sydney, Sydney, Australia  
24

25 <sup>5</sup>Department of Renal Medicine, Westmead Hospital, Westmead, Australia  
26

27 <sup>6</sup>Westmead Applied Research Centre, Faculty of Medicine and Health, The University of Sydney,  
28  
29 Sydney, Australia  
30

31 <sup>7</sup>Department of Diabetes & Endocrinology, Westmead Hospital, Westmead, Australia  
32

33 <sup>8</sup>Charles Perkins Centre, The University of Sydney, Sydney, Australia  
34  
35

36 Address for correspondence

37  
38 Email: [sarah.melov@health.nsw.gov.au](mailto:sarah.melov@health.nsw.gov.au)  
39  
40  
41  
42  
43  
44  
45  
46  
47  
48  
49  
50  
51  
52  
53  
54  
55  
56  
57  
58  
59  
60



## Abstract

**Objective** Investigate the impact of the COVID-19 pandemic on perinatal outcomes in an Australian high migrant and low COVID-19 prevalent population to identify if COVID-19 driven health service changes and societal influences impact obstetric and perinatal outcomes.

**Design** Retrospective cohort study with pre COVID-19 period 1st January 2018-31st January 2020, and first year of global COVID-19 period 1st February 2020–31st January 2021. Multivariate logistic regression analysis was conducted adjusting for confounders including age, area-level socioeconomic status, gestation, parity, ethnicity and BMI.

**Setting** Obstetric population attending three public hospitals including a major tertiary referral centre in Western Sydney, Australia.

**Participants** Women who delivered with singleton pregnancies over 20 weeks gestation. Ethnically diverse women, 66% overseas born. There were 34 103 births in the district that met inclusion criteria: before COVID-19 n=23 722, during COVID-19 n=10 381.

**Main outcome measures** Induction of labour, caesarean section delivery, iatrogenic and spontaneous preterm birth, small for gestational age (SGA), composite neonatal adverse outcome, and full breastfeeding at hospital discharge.

**Results** During the first year of COVID-19 there was no change for induction of labour (aOR 0.97; 95% CI 0.92-1.02, p=0.26) and a 25% increase in caesarean section births (aOR 1.25; 95% CI 1.19-1.32, p<0.001). During the COVID-19 period we found no change in iatrogenic preterm births (aOR 0.94; 95% CI 0.80-1.09) but a 15% reduction in spontaneous preterm birth (aOR 0.85; 95% CI 0.75-0.97, p=0.02) and a 10% reduction in SGA infants at birth (aOR 0.90; 95% CI 0.82-0.99, p=0.02). Composite adverse neonatal outcomes were marginally higher (aOR 1.08; 95% CI 1.00-1.15, p=0.04) and full breastfeeding rates at hospital discharge reduced by 15% (aOR 0.85; 95% CI 0.80-0.90, p<0.001).

1  
2  
3 **Conclusion** Despite a low prevalence of COVID-19, both positive and adverse obstetric  
4  
5 outcomes were observed that may be related to changes in service delivery and interaction with  
6  
7 health care providers. Further research is suggested to understand the drivers for these changes.  
8  
9

10  
11 Keywords: COVID-19, Breastfeeding, Coronavirus, Pandemic, Preterm birth  
12  
13 Word count: 3259  
14

### 15 16 **Strengths and limitations of this study**

- 17  
18 • The analysis provides the opportunity to evaluate the indirect effects of COVID-19  
19  
20 against a background of low COVID-19 prevalence in the local health district with a  
21  
22 total of six women with COVID-19 during pregnancy for the study period.  
23  
24
- 25  
26 • The cohort comprised of a large ethnically diverse population with similar exposure  
27  
28 of restriction experience and service delivery changes.  
29
- 30  
31 • Analysis for both iatrogenic and spontaneous preterm birth.  
32
- 33  
34 • Missing some COVID-19 related confounders is a limitation such as physical activity  
35  
36 levels, prevalence of pregnancy population working from home, or missing planned  
37  
38 overseas social support due to international border restrictions.  
39
- 40  
41 • A limitation of the study is multiple outcomes were compared however, our results  
42  
43 are consistent with several other studies in different populations increasing the  
44  
45 veracity of our findings.

46 **A funding statement:** A two-year grant was awarded to SJ Melov by the Westmead  
47  
48 Charitable Trust. Some funds from this grant were used to support this research: statistical  
49  
50 analysis, publication costs. The funding body had no role in the study design, analysis or  
51  
52 manuscript development.  
53

### 54 55 **A competing interest statement**

56  
57 All authors declare they have no conflicts of interest for the research presented in this  
58  
59 manuscript.  
60

### Author contributions

Study designed by SJM, TM, SC, TIA and DP. JE performed the statistical analysis. SJM interpreted the data and wrote the initial and final manuscript drafts with supervision from DP. Invaluable support was given by JE, TM, VWL, NWC, SC, JM, TIA and DP for final interpretation of findings, and critical revision of the article.

### Data Availability statement

Institutional restrictions apply to the availability of these data, and so are not publicly available. Data are however available from the corresponding author upon reasonable request and with permission of WSLHD Human Research and Ethics Committee.

## INTRODUCTION

In the beginning of 2020, non-pharmaceutical interventions to reduce the spread of COVID-19 led to great changes in society such as lockdowns, enforced movement and travel restrictions.<sup>1</sup>

<sup>2</sup> There were also many changes to medical and maternity care around the world that are well documented, impacting direct care and social support.<sup>3-6</sup> Initial concerns of the impact of COVID-19 infection on pregnant women focused research on pregnancy outcomes for women who were infected and results varied, findings included increased COVID-19 infection risk in ethnic minorities, and a rise in both preterm and caesarean births.<sup>7-10</sup> More recently perinatal research has assessed the indirect impact of the pandemic,<sup>11</sup> particularly the impact of lockdowns.<sup>12-14</sup> Indirect impact will vary significantly between countries and within country due to diverse drivers such as lockdown experiences, social distancing measures, COVID-19 prevalence, societal compliance, economic and healthcare access.<sup>4 6 15</sup>

Studies of the indirect effects of COVID-19 on pregnancy outcome have shown inconsistent results. A reduction in preterm birth in the general population during the pandemic has been

1  
2  
3 reported by some authors but not others.<sup>12 16-18</sup> Differences in study design and other factors  
4  
5 have led some authors to conclude that there is insufficient evidence to determine if preterm  
6  
7 birth has been reduced during COVID-19.<sup>19</sup>  
8  
9

10  
11  
12 Maternity care in Australia during the first year of the pandemic in 2020 experienced a  
13  
14 disparate range of changes from very little to significant alterations in service delivery,  
15  
16 dependent on population and perceived risk in the community.<sup>3 20</sup> Little evidence exists for the  
17  
18 impact of societal and service changes on a culturally diverse obstetric population who initially  
19  
20 experienced minimal COVID-19 community transmission, a short lockdown period but  
21  
22 experienced significant obstetric service and societal changes due to the pandemic.  
23  
24  
25

26  
27  
28 In our study population, we hypothesise obstetric outcomes may have been impacted by the  
29  
30 rapid changes in hospital service delivery as they shifted focus during the pandemic from  
31  
32 patient centred care to preservation of service and staff.<sup>21</sup> Western Sydney with its multicultural  
33  
34 population is an ideal environment to examine the indirect effects of the response to the  
35  
36 pandemic on perinatal outcomes given the setting of low COVID-19 case numbers. There was  
37  
38 a total of 632 cases recorded of COVID-19 in the local health district for the study period.  
39  
40 However, considerable preventative measures were implemented in the region including access  
41  
42 to telehealth, ability to work from home, restrictions in healthcare settings such as mask  
43  
44 wearing and health-screening questions on entry to all hospitals.<sup>22</sup>  
45  
46  
47  
48  
49

50  
51 We aim to identify indirect and pandemic-related morbidity in our large multi-ethnic  
52  
53 Australian population and uncover potential drivers for both improved and adverse maternity  
54  
55 care outcomes.  
56  
57  
58  
59  
60

## METHODS

We conducted a retrospective cohort study using routinely collected obstetric, medical and administrative data for women seeking antenatal care in the Western Sydney Local Health District. We compared birth outcomes greater than or equal to 20 weeks of gestation in the two years prior to the COVID-19 pandemic to the first year of the COVID-19 pandemic. The study period is defined as pre COVID-19 1st January 2018 – 31st January 2020 to the first twelve months of the COVID-19 pandemic 1st February 2020 – 31st January 2021.

The state of New South Wales (NSW) has a population of approximately 8.2 million.<sup>23</sup> The three study hospitals serve a health district population of approximately one million people. For the study period a total of 39 pregnant women had a confirmed COVID-19 diagnosis in NSW, six of these were in the study health district and none of these were admitted to hospital for COVID-19 complications. There were fewer than 60 COVID-19 related deaths recorded for the total population in NSW in the first year.<sup>24</sup> The prevalence of COVID-19 in the local community was also low (total 632 cases Supp Figure 1).<sup>25</sup>

The study period was determined by the time when public awareness grew in NSW of the impending pandemic with official government announcements and a sharp rise and dominance of media coverage concerning COVID-19 from early February 2020.<sup>26</sup> The study period was after the 30<sup>th</sup> January 2020 WHO announcement declaring 2019-nCoV virus (COVID-19) as a public health emergency of international concern.<sup>27</sup> Public health order restrictions commenced 16<sup>th</sup> March 2020 with restrictions on gathering of over 500 people in NSW to reduce the spread of COVID-19. The restrictions escalated on the 30<sup>th</sup> March 2020, to 'hard lockdown' issuing of public health orders "that a person must not, without reasonable excuse, leave the person's

1  
2  
3 place of residence'.<sup>27</sup> The restrictions were present for approximately 7 weeks easing 15<sup>th</sup> May,  
4  
5 2020.  
6  
7  
8  
9

10 The short hard lockdown in NSW, was primarily enforced in greater Sydney, accompanied by  
11 increased restrictions and COVID-safe practices including all health facilities women and their  
12 families accessed. The restrictions for local maternity services included hospital entrance  
13 screening of all patients, staff and visitors including temperature checks, asking about recent  
14 travel and symptoms of COVID-19. Within the antenatal service, there was also an introduction  
15 of telehealth for the Diabetes in Pregnancy clinics, restrictions on visitors such as allowing only  
16 patients in waiting rooms, no support person during ultrasound and only one support person  
17 with no changing-over in the birth unit. The potential changes in background stress for women  
18 during the peripartum due to these restrictions, reduced social support and service delivery  
19 changes may potentially impact perinatal outcomes.<sup>28</sup> During this time there were frequent  
20 changes to service delivery and some confusion regarding rules for patients reported by staff  
21 at the tertiary referral study Hospital.<sup>21</sup>  
22  
23  
24  
25  
26  
27  
28  
29  
30  
31  
32  
33  
34  
35  
36  
37  
38  
39

40 Women in the public health sector in NSW are triaged to their nearest public hospital for  
41 pregnancy care according to their home address and pregnancy complications. Therefore,  
42 during the pandemic period there would be limited changes in referrals pathways for the district  
43 obstetric population.  
44  
45  
46  
47  
48  
49  
50

51 Community activities returned to near normal by July 2020 in NSW, however international and  
52 state borders continued to be disrupted with ongoing outbreaks emerging. Restrictions to  
53 visitors and other COVID-19 risk mitigation policies remained present for the maternity  
54  
55  
56  
57  
58  
59  
60

1  
2  
3 services throughout the study period. COVID-19 vaccinations were not available in Australia  
4  
5 during the study period.  
6  
7  
8  
9

10 Western Sydney Local Health District human research ethics committee provided ethical  
11  
12 approval for this study using deidentified routinely collected administrative data (WSLHD  
13  
14 HREC QA2101-15).  
15  
16  
17  
18

### 19 **Definitions**

20  
21 Routinely collected maternity data for singleton pregnancies greater than 20 weeks gestation  
22  
23 was retrieved from the electronic maternal database. Terminations of pregnancy were not  
24  
25 included in the database. Gestational age was determined and calculated in the electronic  
26  
27 maternity system utilising the rules: use of last menstrual period (LMP) if regular, date was  
28  
29 amended after available early ultrasound 6 week - 13+6 weeks gestation. If ultrasound dating  
30  
31 varies from LMP by more than 5 days, if irregular or uncertain LMP then ultrasound expected  
32  
33 date of delivery (EDD) was used.  
34  
35  
36  
37  
38  
39

40 Area-level socioeconomic status (SES) in our study was derived from the postcode address of  
41  
42 participants during pregnancy as determined for that area by the last Australian census  
43  
44 information (2016), informing the Index of Relative Socioeconomic Disadvantage (IRSD). The  
45  
46 index is based on households in that area using information on variables that include income,  
47  
48 English fluency, education and employment status. A lower index score represents greater  
49  
50 disadvantage.<sup>29</sup>  
51  
52  
53  
54  
55  
56  
57  
58  
59  
60

### Outcomes of interest

Outcomes of interest were selected based on literature review, state obstetric benchmarking outcomes and outcomes that plausibly may be impacted by service delivery changes. Literature has reported criteria changes in some healthcare setting for induction of labour and overall induction rates changing, therefore we included any induction via any method at all gestations in our outcomes of interest. We defined all vaginal births as one outcome inclusive of breech vaginal births. All preterm births were defined as less than 37 weeks gestation. Spontaneous preterm was defined as vaginal preterm births without an induction or caesarean section preterm births with a history of preterm labour. Iatrogenic preterm births were those initiated by care providers, defined as either a planned caesarean section with no preterm labour or an induction prior to 37 weeks gestation. Small for gestational age (SGA) is birth weight less than 10<sup>th</sup> centile assessed by the Fenton growth chart.<sup>30</sup> Combined adverse neonatal outcome included any of the following; stillbirth, admission to special care/neonatal intensive care (NICU), Apgar score under 7 at 5 minutes, or newborn resuscitation with intubation.

### Data analysis and statistical methods

Demographic and obstetric characteristics of women were compared before and during the first year of COVID-19 using the chi-squared, Fisher's exact, or t-test where appropriate. Univariate logistic regression was applied to each characteristic to estimate unadjusted odds ratios. Then, three adjusted models were devised and implemented using multivariate logistic regression. Model 1 was for maternal characteristics and adjusted for maternal age, area-level socioeconomic status, gestational age (except for the preterm birth outcome), parity, ethnicity, BMI, smoking status and mental health status. Model 2 adjusted for model of pregnancy care and the variables from Model 1. Model 3 adjusted for additional covariates that are clinically relevant for specific outcomes. For the caesarean section birth outcome, birthweight and



1  
2  
3 induction of labour were added to the covariates from Models 1 and 2. For the preterm birth  
4  
5 outcome, a composite gestational diabetes/hypertension variable was added to the covariates  
6  
7 from Models 1 and 2. For the breastfeeding outcome, mode of delivery, length of stay <24  
8  
9 hours, and preterm birth were added to the covariates form Models 1 and 2. For each model,  
10  
11 an adjusted odds ratio with a 95% confidence interval was reported. P values less than 0.05  
12  
13 were considered statistically significant. The cohort was restricted to records with complete  
14  
15 data on outcomes of interest. Missing indicator variables were utilised for covariates in the  
16  
17 multivariate analyses. All statistical analyses were completed using Stata Special Edition  
18  
19 Version 14.2 (StataCorp).  
20  
21  
22

### 23 **Patient public involvement statement**

24  
25  
26 This retrospective cohort study had no patient public involve in the design or analysis or  
27  
28 dissemination of results.  
29  
30  
31  
32  
33  
34  
35  
36  
37  
38  
39  
40  
41  
42  
43  
44  
45  
46  
47  
48  
49  
50  
51  
52  
53  
54  
55  
56  
57  
58  
59  
60

## RESULTS

### Baseline characteristics

The pre COVID-19 period had a total of 23 722 singleton births and during the first year of COVID-19 (period 1st February 2020–31st January 2021) there were 10 381 singleton births. The principle tertiary referral centre had the greatest number of births in the cohort (n=17 005; 49.9%), with the large secondary hospital comprising of 36.6% (n=12 467) of the cohort.

Women who birthed in the first year of COVID-19 were more likely to be Australian born (35.1% vs 32.9%), overweight or obese (45.8% vs 44.5%), under 35 years old (59.7% vs 50.6%), have a history of a mental illness (15% vs 13%), to present for their first comprehensive antenatal visit at <10 weeks gestation (80.8% vs 64.4%) and less likely to be privately insured (5.9% vs 6.9%) compared to the preceding two years (Table 1). Women were admitted antenatally less often (10.1% vs 12.1%) and women who elected to have an early discharge postpartum at <24 hours, were higher from 15.5% during the pre-COVID period to 19.1% in the first year of COVID-19. Other demographic and pregnancy characteristics are documented in Table 1.

### Pregnancy complications and outcomes

There were no differences in overall median gestation age at birth between the two time periods (Table 2). We did observe that the rate of preterm birth was lower during COVID-19 compared to the preceding period (7.2% vs 8.1%). We also observed a higher proportion of births at or after 41 weeks gestation during the first year of COVID-19 (10.0% vs 9.0%). We identified a reduction in all vaginal births (66.6% vs 69.6%) including reduced vaginal breech births (0.7% vs 0.9%). This corresponded with the caesarean section rate increasing during the first year of the COVID-19 pandemic (33.4% vs 30.5%) (Table 2). There was an overall higher rate of

1  
2  
3 induction of labour (35.3% vs 29.9%) and a lower rate of SGA births (6.9% vs 7.8%). We  
4  
5 found no change for adverse birth outcomes including for stillbirth (0.9% vs 1.0%) or  
6  
7 admissions to special care/neonatal intensive care (16.8% vs 16.2%) (Table 2).  
8  
9

10  
11  
12 In adjusted analysis no difference was identified for labour inductions during the COVID-19  
13  
14 period compared to the pre-COVID period (aOR 0.97; 95% CI 0.92-1.02). There was a 25%  
15  
16 increase in caesarean section births during the pandemic first year in our health district (aOR  
17  
18 1.25; 95% CI 1.19-1.32) (Table 3). The rate of spontaneous preterm births was reduced by 15%  
19  
20 (aOR 0.85; 95% CI 0.78-0.95) and no change was found for iatrogenic preterm births (aOR  
21  
22 0.94; 95% CI 0.80-1.09) (Table 3). Adjusted models also uncovered a 10% reduction for SGA  
23  
24 infants at birth during the COVID-19 period (aOR 0.90; 95% CI 0.82-0.99). We found a  
25  
26 marginal increase for a combined adverse neonatal outcome during the COVID-19 period (aOR  
27  
28 1.08; 95% CI 1.00-1.15) (Table 3).  
29  
30  
31  
32  
33  
34

35  
36 In our study population, the first year of the pandemic impacted breastfeeding when compared  
37  
38 to the previous two years. When adjusted for several confounders including birthweight, mode  
39  
40 of delivery, and prematurity, we found a 15% reduction for women fully breastfeeding their  
41  
42 infant at discharge (aOR 0.85; 95% CI 0.80-0.90) (Table 3). There was no difference in effect  
43  
44 size between model 1 and the fully adjusted model that included birthweight, mode of delivery,  
45  
46 length of stay <24 hours and gestational age/preterm variable. Notably, there was a higher rate  
47  
48 during the COVID-19 period in both breastfeeding within one hour (61.9% vs 60.5%,  $p=0.02$ )  
49  
50 after birth and maternal/infant skin to skin contact at birth (76.7% vs 69.4%,  $p=0.02$ ) (Table  
51  
52  
53  
54 2).  
55  
56  
57  
58  
59  
60

## DISCUSSION

In a health district with low COVID-19 prevalence but affected by public health measures and process changes to service delivery, we found no differences in the rate of induction of labour, a reduction in spontaneous preterm and SGA births with no change in iatrogenic preterm births during the first year of COVID-19. There was also a significant increase in caesarean section births and a reduction in women fully breastfeeding at hospital discharge during this period compared to the previous two years. We identified a marginal increase in the rate of severe adverse neonatal composite outcome. In the study population only six women were recorded to have experienced COVID-19 infection during pregnancy therefore the outcome changes identified in this study are likely related to the indirect effects of COVID-19.

A strength of the study is the population experienced similar exposure to COVID-19 restrictions and maternity care service delivery changes. The multiethnic population with an even distribution between national SES quintiles strengthens the generalisability of our findings to other high-income populations with universal health coverage such as the United Kingdom. A more homogenous population may provide a possible explanation of changes to be specific cultural drivers however the diversity of the study population supports the explanation to likely be societal and service delivery related. A limitation is the difficulty of identifying all changing population drivers however adjustment was made for known factors.

There may have been other confounders we were not able to capture that may impact on obstetric outcomes such as level of physical activity. Potentially some women may have benefited from more time to exercise with associated reduced infection risk through exercise-mediated protective immune response<sup>31</sup>, while other women who felt unwell may have had the opportunity to rest at home. There may potentially be a uniquely cumulative improved immune

1  
2  
3 environment for pregnant women during the COVID-19 period. Underlying factors such as  
4  
5 consistent diet stabilising the microbiome and less maternal inflammatory triggers or burden  
6  
7 from exposure to environmental and infectious factors may be the reason for improved  
8  
9 spontaneous preterm birth rate and SGA outcomes.  
10  
11

12  
13  
14  
15 It is difficult to capture individual responses to the threat of COVID-19 despite low prevalence  
16  
17 in the community for this cohort. However, recent qualitative research at one study hospital  
18  
19 found clinicians felt some groups of women benefited from the COVID-19 restrictions with  
20  
21 less stress and protected family time. However, migrant women were seen to have experienced  
22  
23 isolation and anxiety due to loss of significant practical and social support from overseas  
24  
25 relatives unable to visit due to COVID-19 related international border closures.<sup>21 32</sup> The impact  
26  
27 of the loss of expected support from relatives due to COVID-19 travel restrictions was not  
28  
29 measured in our study and is a limitation.  
30  
31  
32

33  
34  
35 Similar to other studies, we document a reduction in preterm birth.<sup>12 17 18 33</sup> The lack of  
36  
37 delineation between iatrogenic and spontaneous preterm birth in some research has been an  
38  
39 issue when comparing results and attempts to identify potential drivers.<sup>19</sup> A strength of our  
40  
41 study is we were able to present the data and identified that only spontaneous preterm birth was  
42  
43 reduced for the study period. However recent updated preterm birth meta-analysis by Yang et  
44  
45 al found in unadjusted analysis preterm birth was reduced for both spontaneous and iatrogenic  
46  
47 only in single centre studies, but not in national studies.<sup>6</sup> Local district level data and population  
48  
49 characteristics may have less variation in obstetric service delivery confounders and other  
50  
51 factors that increase the uniformity of experience for women and may account for the difference  
52  
53 between large national level data and some single centre research. Local, more granular data  
54  
55 for obstetric outcomes during the COVID-19 pandemic may assist in understanding drivers for  
56  
57  
58  
59  
60

1  
2  
3 improved and adverse obstetric outcomes. The stable iatrogenic preterm birth rate is a positive  
4 finding and reflects no change in clinical management for this important obstetric outcome.  
5  
6 This may partly be associated with the ongoing understanding of the adverse outcomes  
7 associated with late preterm births and recent national initiatives such as ‘every week counts’  
8 that has occurred over the study period.<sup>34</sup>  
9  
10  
11  
12  
13  
14  
15  
16

17 Shah et al in a Canadian population study, found no reduction in preterm births however, they  
18 did demonstrate preterm birth variation over time and between districts.<sup>35</sup> Our study covers the  
19 complete first year of the pandemic, reducing the possibility of a result based on a chance  
20 normal short-term variation.  
21  
22  
23  
24  
25  
26  
27

28 It has been postulated that the causative mechanism for a reduction in preterm births during  
29 the COVID-19 period is reduced infection and maternal physical activity throughout  
30 lockdown.<sup>36</sup> In our population, these potential causative factors for a reduction in spontaneous  
31 preterm birth, may have existed in our health district during the short lockdown and likely  
32 persisted beyond the lockdown period. Some infection mitigation behaviours may have been  
33 driven by our high migrant population who received advice from overseas relatives in areas  
34 experiencing high rates of COVID-19. Encouraging suitable exercise<sup>31</sup> and simple hygiene  
35 measures such as appropriate hand washing, are public health measures that may reduce  
36 infection. Hand hygiene historically has been poorly done and with increased awareness and  
37 compliance, may assist with decreasing preterm births.<sup>37 38</sup>  
38  
39  
40  
41  
42  
43  
44  
45  
46  
47  
48  
49  
50  
51  
52  
53

54 We found women were presenting earlier to their family doctors for a first pregnancy visit and  
55 referral to tertiary hospital care. This may have been due to anxiety about the pregnancy and  
56 the unknown risk of COVID-19 infection to a fetus. The benefits of this early health provider  
57  
58  
59  
60

1  
2  
3 contact may be correct dietary advice, provide opportunity for early aspirin prescription and  
4 other pregnancy care that may contribute to some of the improved pregnancy outcomes  
5 including preterm birth and SGA for this cohort. It is possible that the drivers for the reduction  
6 of spontaneous preterm birth and SGA are similar and multifactorial. They may include the  
7 opportunity for partners and pregnant women to work from home with the associated reduction  
8 in stress.  
9

10  
11  
12 The increase in caesarean section births in this study is a concerning finding that may indicate  
13 changes in clinical decision making during the COVID-19 period of a lower threshold trigger  
14 for immediate delivery. However other factors may also be involved such as less surveillance  
15 during pregnancy with maternal reluctance to present or be in hospitals as demonstrated by the  
16 increase in early discharge. Another human factor that may be involved in the rise in caesarean  
17 section birth is the difficulty of midwives in birth unit to develop a rapport with the women in  
18 their care to adequately assess their non-verbal cues, recent studies have identified midwives  
19 report a loss of 'women-centred care' during the COVID-19 pandemic.<sup>20 21</sup> Clinician may rely  
20 more on electronic 'socially distant' continuous cardiotocography (CTG) monitoring for fetal  
21 assessment. Evidence suggests increased CTG monitoring leads to higher caesarean section  
22 rates.<sup>39 40</sup> The increase in caesarean section births also have known immediate and long-term  
23 associated morbidity for women and their infants, therefore measures to counter the rise in  
24 caesarean births are recommended.<sup>41</sup>  
25  
26  
27  
28  
29  
30  
31  
32  
33  
34  
35  
36  
37  
38  
39  
40  
41  
42  
43  
44  
45  
46  
47  
48  
49  
50

51 There was a marginal increase in the composite adverse neonatal outcome largely driven by  
52 the increase in neonatal admissions. Although it is beyond the scope of this study to determine  
53 the causes for the increased admission, there was no alteration in admission criteria for the  
54 neonatal or special care nursery during the study period. However, the increase in caesarean  
55  
56  
57  
58  
59  
60

1  
2  
3 birth may have contributed through the associated known increased risk of NICU admission  
4  
5 with a caesarean section birth.<sup>41 42</sup>  
6  
7  
8  
9

10 Similar to our study, a prospective Italian study found a 28% reduction in full breastfeeding at  
11 discharge in a region with high COVID-19 prevalence.<sup>43</sup> We identified that during the COVID-  
12 19 period there was an improvement in practices that support breastfeeding immediately after  
13 birth; maternal-infant skin to skin contact and breastfeeding within the first hour. Birth unit  
14 protocols changed during the COVID-19 period, with only one support person allowed at the  
15 birth. The improvement in skin to skin and breastfeeding in the first hour may potentially be  
16 due to midwives identifying that woman were feeling more isolated and provided more one-to  
17 one support in the birth room improving these important breastfeeding outcomes. There may  
18 be several factors that contribute to less exclusive breastfeeding at discharge in our study.  
19 Intuitively the reduction in breastfeeding should be linked with the increase in early discharge  
20 however the 25% reduction in full breastfeeding was present for both model 2 and the final  
21 model that adjusted for variables including early discharge. Other factors are therefore more  
22 likely influencing this outcome. Due to reduced visitors, women may have felt they needed to  
23 bring formula into the hospital in case they had difficulty with breastfeeding, therefore it was  
24 available and more likely to be used. There may also have been reduced opportunities for staff  
25 to provide postnatal breastfeeding support due to concerns of COVID-19 infection risk by both  
26 staff and patients, staffing shortages and increased staff workload during the COVID-19 period.  
27 It is well acknowledged the introduction of formula and bottle feeding in the early postnatal  
28 period has significant consequences for infant long-term health and reduces total length of  
29 breastfeeding.<sup>44-46</sup> Providing adequate lactation support antenatally, at birth and postnatally  
30 with staff shortages during the pandemic is problematic but important for both short-term and  
31 long-term metabolic maternal and infant health.<sup>44 47 48</sup>  
32  
33  
34  
35  
36  
37  
38  
39  
40  
41  
42  
43  
44  
45  
46  
47  
48  
49  
50  
51  
52  
53  
54  
55  
56  
57  
58  
59  
60



1  
2  
3  
4  
5  
6 Although recent literature has focused on the impact of COVID-19 disease and pregnancy, the  
7 indirect impact of the world-wide pandemic may not be fully realised for many years. There is  
8 increasing evidence of the impact of exposure to disasters including pandemics, on long term  
9 health consequences. A recent systematic review concluded fetal and maternal exposure to  
10 natural disasters including pandemics resulted in increased cardiometabolic risk in both.<sup>49</sup>  
11  
12 Understanding a pandemic population with a low prevalence of COVID-19 but subject to  
13 changes in maternity care and societal stress, may assist in future investigations of drivers for  
14 cardiometabolic health.  
15  
16  
17  
18  
19  
20  
21  
22  
23  
24  
25

## 26 CONCLUSIONS

27  
28 In a low COVID-19 prevalent population this study found no change in inductions of labour or  
29 iatrogenic preterm births. However, an increase in caesarean section births, a reduction in SGA  
30 and spontaneous preterm births was identified. The benefit to women, their families and the  
31 community of reduced SGA and preterm birth is long lasting, including improved  
32 cardiometabolic lifetime risk for both women and their infants.<sup>42</sup> The drivers for these changes  
33 in perinatal outcomes during the COVID-19 first year may be difficult to identify but may be  
34 a reduction in maternal inflammatory triggers. However, the results from this study in a cohort  
35 primarily exposed only to COVID-19 related service and societal changes, provides unique  
36 opportunity to generate evidence of these changes on pregnancy complications. The significant  
37 reduction in breastfeeding at discharge may be more easily addressed now identified. Funding  
38 appropriate intervention strategies is imperative both in the antenatal and postnatal periods to  
39 improve breastfeeding outcomes. Revealing all drivers for obstetric changes during the  
40 pandemic may be difficult to ascertain, further research in this high migrant cohort with higher  
41 prevalence of COVID-19 cases may reveal evidence for more specific drivers.  
42  
43  
44  
45  
46  
47  
48  
49  
50  
51  
52  
53  
54  
55  
56  
57  
58  
59  
60

## References

1. Suryanarayanan P, Tsou CH, Poddar A, et al. AI-assisted tracking of worldwide non-pharmaceutical interventions for COVID-19. *Sci Data* 2021;**8**(1):94. doi: 10.1038/s41597-021-00878-y
2. Haug N, Geyrhofer L, Londei A, et al. Ranking the effectiveness of worldwide COVID-19 government interventions. *Nat Hum Behav* 2020;**4**(12):1303-12. doi: 10.1038/s41562-020-01009-0
3. Bradfield Z, Wynter K, Hauck Y, et al. Experiences of receiving and providing maternity care during the COVID-19 pandemic in Australia: A five-cohort cross-sectional comparison. *PLoS One* 2021;**16**(3):e0248488. doi: 10.1371/journal.pone.0248488
4. Cutler DM, Summers LH. The COVID-19 Pandemic and the \$16 Trillion Virus. *JAMA* 2020;**324**(15):1495-96. doi: 10.1001/jama.2020.19759
5. Pak A, Adegboye OA, Adekunle AI, et al. Economic Consequences of the COVID-19 Outbreak: the Need for Epidemic Preparedness. *Frontiers in Public Health* 2020;**8**(241) doi: 10.3389/fpubh.2020.00241
6. Yang J, D'Souza R, Kharrat A, et al. Coronavirus disease 2019 pandemic and pregnancy and neonatal outcomes in general population: A living systematic review and meta-analysis (updated Aug 14, 2021). *Acta Obstet Gynecol Scand* 2021 doi: 10.1111/aogs.14277
7. Acosta AM, Garg S, Pham H, et al. Racial and Ethnic Disparities in Rates of COVID-19–Associated Hospitalization, Intensive Care Unit Admission, and In-Hospital Death in the United States From March 2020 to February 2021. *JAMA Network Open* 2021;**4**(10):e2130479-e79. doi: 10.1001/jamanetworkopen.2021.30479
8. Agyemang C, Richters A, Jolani S, et al. Ethnic minority status as social determinant for COVID-19 infection, hospitalisation, severity, ICU admission and deaths in the early phase of the pandemic: a meta-analysis. *BMJ Global Health* 2021;**6**(11):e007433. doi: 10.1136/bmjgh-2021-007433
9. Matar R, Alrahmani L, Monzer N, et al. Clinical Presentation and Outcomes of Pregnant Women With Coronavirus Disease 2019: A Systematic Review and Meta-analysis. *Clin Infect Dis* 2021;**72**(3):521-33. doi: 10.1093/cid/ciaa828
10. Papapanou M, Papaioannou M, Petta A, et al. Maternal and Neonatal Characteristics and Outcomes of COVID-19 in Pregnancy: An Overview of Systematic Reviews. *Int J Environ Res Public Health* 2021;**18**(2) doi: 10.3390/ijerph18020596
11. Du M, Yang J, Han N, et al. Association between the COVID-19 pandemic and the risk for adverse pregnancy outcomes: a cohort study. *BMJ Open* 2021;**11**(2):e047900. doi: 10.1136/bmjopen-2020-047900
12. Been JV, Burgos Ochoa L, Bertens LCM, et al. Impact of COVID-19 mitigation measures on the incidence of preterm birth: a national quasi-experimental study. *The Lancet Public Health* 2020;**5**(11):e604-e11. doi: [https://doi.org/10.1016/S2468-2667\(20\)30223-1](https://doi.org/10.1016/S2468-2667(20)30223-1)
13. Gallo LA, Gallo TF, Borg DJ, et al. A decline in planned, but not spontaneous, preterm birth rates in a large Australian tertiary maternity centre during COVID-19 mitigation measures. *Aust N Z J Obstet Gynaecol*;n/a(n/a) doi: <https://doi.org/10.1111/ajo.13406>
14. Rolnik DL, Matheson A, Liu Y, et al. Impact of COVID-19 pandemic restrictions on pregnancy duration and outcome in Melbourne, Australia. *Ultrasound Obstet Gynecol* 2021;**58**(5):677-87. doi: <https://doi.org/10.1002/uog.23743>
15. Nam SH, Nam JH, Kwon CY. Comparison of the Mental Health Impact of COVID-19 on Vulnerable and Non-Vulnerable Groups: A Systematic Review and Meta-Analysis of Observational Studies. *Int J Environ Res Public Health* 2021;**18**(20) doi: 10.3390/ijerph182010830

16. Bian Z, Qu X, Ying H, et al. Are COVID-19 mitigation measures reducing preterm birth rate in China? *BMJ Glob Health* 2021;**6**(8) doi: 10.1136/bmjgh-2021-006359
17. Chmielewska B, Barratt I, Townsend R, et al. Effects of the COVID-19 pandemic on maternal and perinatal outcomes: a systematic review and meta-analysis. *Lancet Glob Health* 2021;**9**(6):e759-e72. doi: 10.1016/s2214-109x(21)00079-6
18. Kirchengast S, Hartmann B. Pregnancy Outcome during the First COVID 19 Lockdown in Vienna, Austria. *Int J Environ Res Public Health* 2021;**18**(7) doi: 10.3390/ijerph18073782
19. Goldenberg RL, McClure EM. Have Coronavirus Disease 2019 (COVID-19) Community Lockdowns Reduced Preterm Birth Rates? *Obstet Gynecol* 2021;**137**(3):399-402. doi: 10.1097/AOG.0000000000004302
20. Bradfield Z, Hauck Y, Homer CSE, et al. Midwives' experiences of providing maternity care during the COVID-19 pandemic in Australia. *Women Birth* 2022;**35**(3):262-71. doi: 10.1016/j.wombi.2021.02.007
21. Melov SJ, Galas N, Swain J, et al. Exploring the COVID-19 pandemic experience of maternity clinicians in a high migrant population and low COVID-19 prevalence country: a qualitative study. *Women and Birth* 2021 doi: <https://doi.org/10.1016/j.wombi.2021.10.011>
22. WSLHD. Year In Review 2019/2020: Protecting and growing our people: WSLHD; 2020 Available from: file:///C:/Users/seren/Downloads/NSW%20Health\_WSLHD\_Year%20in%20Review\_2019-20.pdf.
23. Key Facts about NSW. NSW Government. Available from: <https://www.nsw.gov.au/about-nsw/key-facts-about-nsw#toc-population>
24. NSW Government. COVID-19 weekly surveillance in NSW, Epidemiology week 4, Ending 30 January 2021 Available from: <https://www.health.nsw.gov.au/Infectious/covid-19/Documents/covid-19-surveillance-report-20210130.pdf>
25. NSW Government. NSW COVID-19 data Available from: <https://data.nsw.gov.au>.
26. Nolan D, Hanna, C., McGuinness, K. and McCallum, K. . Covering COVID-19: How Australian Media reported the Coronavirus pandemic in 2020. In: Centre NMR, ed. Canberra: University of Canberra., 2021.
27. World Health Organisation. Statement on the second meeting of the International Health Regulations (2005) Emergency Committee regarding the outbreak of novel coronavirus (2019-nCoV) 2020 Available from: [https://www.who.int/news/item/30-01-2020-statement-on-the-second-meeting-of-the-international-health-regulations-\(2005\)-emergency-committee-regarding-the-outbreak-of-novel-coronavirus-\(2019-ncov\)](https://www.who.int/news/item/30-01-2020-statement-on-the-second-meeting-of-the-international-health-regulations-(2005)-emergency-committee-regarding-the-outbreak-of-novel-coronavirus-(2019-ncov)).
28. Traylor CS, Johnson JD, Kimmel MC, et al. Effects of psychological stress on adverse pregnancy outcomes and nonpharmacologic approaches for reduction: an expert review. *American Journal of Obstetrics & Gynecology MFM* 2020;**2**(4):100229. doi: <https://doi.org/10.1016/j.ajogmf.2020.100229>
29. Australian Bureau of Statistics. Census of Population and Housing: Socio-Economic Indexes for Areas (SEIFA), Australia, 2016 Canberra: Australian Government; 2018 Available from: <https://www.abs.gov.au/ausstats/abs@.nsf/Lookup/by%20Subject/2033.0.55.001~2016~Main%20Features~IRSD~19>
30. Fenton TR, Nasser R, Eliasziw M, et al. Validating the weight gain of preterm infants between the reference growth curve of the fetus and the term infant. *BMC Pediatr* 2013;**13**:92. doi: 10.1186/1471-2431-13-92
31. Scheffer DdL, Latini A. Exercise-induced immune system response: Anti-inflammatory status on peripheral and central organs. *Biochim Biophys Acta Mol Basis Dis* 2020;**1866**(10):165823-23. doi: 10.1016/j.bbadis.2020.165823
32. Melov SJ, Hitos K. Venous thromboembolism risk and postpartum lying-in: Acculturation of Indian and Chinese women. *Midwifery* 2018;**58**:13-18. doi: 10.1016/j.midw.2017.11.006

33. Einarsdóttir K, Swift EM, Zoega H. Changes in obstetric interventions and preterm birth during COVID-19: A nationwide study from Iceland. *Acta Obstet Gynecol Scand* 2021;**100**(10):1924-30. doi: <https://doi.org/10.1111/aogs.14231>
34. Women and Babies Research KI. Every Week Counts: The University of Sydney; 2020 [Available from: <https://everyweekcounts.com.au/>].
35. Shah PS, Ye XY, Yang J, et al. Preterm birth and stillbirth rates during the COVID-19 pandemic: a population-based cohort study. *CMAJ* 2021;**193**(30):E1164-e72. doi: 10.1503/cmaj.210081
36. Hedermann G, Hedley PL, Bækvad-Hansen M, et al. Danish premature birth rates during the COVID-19 lockdown. *Arch Dis Child Fetal Neonatal Ed* 2021;**106**(1):93-95. doi: 10.1136/archdischild-2020-319990
37. Freeman MC, Stocks ME, Cumming O, et al. Hygiene and health: systematic review of handwashing practices worldwide and update of health effects. *Trop Med Int Health* 2014;**19**(8):906-16. doi: 10.1111/tmi.12339
38. Wolf J, Johnston R, Freeman MC, et al. Handwashing with soap after potential faecal contact: global, regional and country estimates. *Int J Epidemiol* 2019;**48**(4):1204-18. doi: 10.1093/ije/dyy253
39. Devane D, Lalor JG, Daly S, et al. Cardiotocography versus intermittent auscultation of fetal heart on admission to labour ward for assessment of fetal wellbeing. *Cochrane Database Syst Rev* 2017;**1**(1):Cd005122. doi: 10.1002/14651858.CD005122.pub5
40. Alfirevic Z, Devane D, Gyte GM, et al. Continuous cardiotocography (CTG) as a form of electronic fetal monitoring (EFM) for fetal assessment during labour. *Cochrane Database Syst Rev* 2017;**2**(2):Cd006066. doi: 10.1002/14651858.CD006066.pub3
41. Antoine C, Young BK. Cesarean section one hundred years 1920–2020: the Good, the Bad and the Ugly. *J Perinat Med* 2021;**49**(1):5-16. doi: doi:10.1515/jpm-2020-0305
42. Li Y, Zhang C, Zhang D. Cesarean section and the risk of neonatal respiratory distress syndrome: a meta-analysis. *Arch Gynecol Obstet* 2019;**300**(3):503-17. doi: 10.1007/s00404-019-05208-7
43. Latorre G, Martinelli D, Guida P, et al. Impact of COVID-19 pandemic lockdown on exclusive breastfeeding in non-infected mothers. *Int Breastfeed J* 2021;**16**(1):36. doi: 10.1186/s13006-021-00382-4
44. Victora CG, Bahl R, Barros AJ, et al. Breastfeeding in the 21st century: epidemiology, mechanisms, and lifelong effect. *Lancet* 2016;**387**(10017):475-90. doi: 10.1016/s0140-6736(15)01024-7
45. Ávila-Ortiz MN, Castro-Sánchez AE, Martínez-González EA, et al. Factors associated with abandoning exclusive breastfeeding in Mexican mothers at two private hospitals. *Int Breastfeed J* 2020;**15**(1):73. doi: 10.1186/s13006-020-00316-6
46. Batista CLC, Ribeiro VS, Nascimento M, et al. Association between pacifier use and bottle-feeding and unfavorable behaviors during breastfeeding. *J Pediatr (Rio J)* 2018;**94**(6):596-601. doi: 10.1016/j.jpmed.2017.10.005
47. Melov SJ, White L, Simmons M, et al. The BLiING study - Breastfeeding length and intensity in gestational diabetes and metabolic effects in a subsequent pregnancy: A cohort study. *Midwifery* 2022;**107**:103262. doi: 10.1016/j.midw.2022.103262
48. Tschiderer L, Seekircher L, Kunutsor SK, et al. Breastfeeding Is Associated With a Reduced Maternal Cardiovascular Risk: Systematic Review and Meta-Analysis Involving Data From 8 Studies and 1 192 700 Parous Women. *J Am Heart Assoc* 2022;**11**(2):e022746. doi: 10.1161/jaha.121.022746
49. De Rubeis V, Lee J, Anwer MS, et al. Impact of disasters, including pandemics, on cardiometabolic outcomes across the life-course: a systematic review. *BMJ Open* 2021;**11**(5):e047152. doi: 10.1136/bmjopen-2020-047152

**Table 1.** Women with a singleton pregnancy: maternal demographic characteristics and pregnancy outcomes first year of COVID-19 compared to pre-COVID in a NSW metropolitan health district  
Pre-COVID-19 = 1<sup>st</sup> January 2018 – 31<sup>st</sup> January 2020 COVID-19 = 1<sup>st</sup> February 2020 – Jan 31<sup>st</sup> 2021

| Characteristics                                     | Pre-COVID-19<br>n = 23,722<br>N (%) | COVID-19<br>n = 10,381<br>N (%) | P value |
|-----------------------------------------------------|-------------------------------------|---------------------------------|---------|
| <b>Clinical &amp; demographic characteristics</b>   |                                     |                                 |         |
| <b>Maternal age group years</b>                     |                                     |                                 |         |
| <20                                                 | 38 (0.2)                            | 46 (0.4)                        | <0.001  |
| 20-24                                               | 614 (2.6)                           | 452 (3.1)                       |         |
| 25-34                                               | 11 335 (47.8)                       | 5 835 (56.2)                    |         |
| 35-39                                               | 8 939 (37.7)                        | 3 335 (32.1)                    |         |
| >39                                                 | 2 796 (11.8)                        | 713 (6.9)                       |         |
| <b>Ethnicity</b>                                    |                                     |                                 |         |
| South Asian                                         | 6047 (25.5)                         | 2 950 (28.4)                    | <0.001  |
| Caucasian/European                                  | 3 307 (13.9)                        | 1 886 (18.1)                    |         |
| South-East Asian                                    | 3249 (13.7)                         | 1 357 (13.1)                    |         |
| Middle Eastern                                      | 8116 (34.2)                         | 3827 (36.9)                     |         |
| Aboriginal Torres Strait Islander                   | 338 (1.4)                           | 188 (1.8)                       |         |
| Unknown/missing <sup>s</sup>                        | 2665 (11.2)                         | 173 (1.7)                       |         |
| Australian born                                     | 7 809 (32.9)                        | 3 648 (35.1)                    | <0.001  |
| <b>SES disadvantage</b>                             |                                     |                                 |         |
| Quintile 1 (most disadvantaged)                     | 5 367 (22.7)                        | 2 361 (22.8)                    | 0.04    |
| Quintile 2                                          | 5 721 (24.1)                        | 2 568 (24.8)                    |         |
| Quintile 3                                          | 3 508 (14.8)                        | 1 494 (14.4)                    |         |
| Quintile 4                                          | 3 291 (13.9)                        | 1 528 (14.7)                    |         |
| Quintile 5 (least disadvantaged)                    | 5 809 (24.6)                        | 2 416 (23.3)                    |         |
| <b>BMI (kg/m<sup>2</sup>) at booking</b>            |                                     |                                 |         |
| <18.50                                              | 1 116 (4.7)                         | 417 (4.5)                       | 0.02    |
| 18.5–24.9                                           | 11 981 (50.5)                       | 5 207 (50.2)                    |         |
| 25.0–29.9                                           | 6 317 (26.3)                        | 2 875 (27.3)                    |         |
| ≥30.0                                               | 4 308 (18.2)                        | 1 922 (18.5)                    |         |
| Nulliparous                                         | 10 331 (43.6)                       | 4 475 (43.1)                    | 0.45    |
| Assisted conception                                 | 1 050 (4.4)                         | 471 (4.5)                       | 0.65    |
| Current smoking at booking                          | 1 380 (5.8)                         | 619 (6.0)                       | 0.60    |
| Disclosed domestic violence                         | 340 (1.5)                           | 141 (1.5)                       | 0.69    |
| Diagnosed mental illness                            | 3 083 (13.0)                        | 1 552 (15.0)                    | <0.001  |
| History of hypertension                             | 844 (3.6)                           | 327 (3.2)                       | 0.06    |
| History of diabetes (T1DM T2DM)                     | 265 (1.3)                           | 114 (1.3)                       | 0.93    |
| History of gestational diabetes                     | 1,555 (6.6)                         | 738 (7.1)                       | 0.06    |
| <b>Health service characteristics</b>               |                                     |                                 |         |
| < 10 weeks gestation first comprehensive assessment | 15,221 (64.4)                       | 8,360 (80.8)                    | <0.001  |
| <b>Model of care</b>                                |                                     |                                 |         |
| Low risk hospital                                   | 15,210 (64.1)                       | 6,768 (65.2)                    | <0.01   |
| Hospital complex medical                            | 6 775 (28.6)                        | 3,096 (29.4)                    |         |
| Private maternity                                   | 1 635 (6.9)                         | 611 (5.9)                       |         |

| No antenatal care                                    | 102 (0.4)    | 38 (0.4)     |        |
|------------------------------------------------------|--------------|--------------|--------|
| Antenatal admission to hospital                      | 2 863 (12.1) | 1 044 (10.1) | <0.001 |
| Postnatal maternal length of stay < one day          | 3 674 (15.5) | 2 000 (19.1) | <0.001 |
| Postnatal maternal length of stay (days, median IQR) | 2.02 (1.51)  | 2.00 (1.68)  | <0.001 |

SES = Socio Economic Status (Index of Relative Socio-economic Disadvantage)

Low risk hospital: Midwifery care and shared antenatal care (General Practitioner/family doctor); Hospital complex medical care: Hospital based medical and high-risk clinic; Private maternity care: Obstetrician & privately practicing midwife

§ missing due to ethnicity as routine collection introduced mid-2018

For peer review only

**Table 2.** Pregnancy outcomes in a low-prevalence COVID-19 high-migrant Australian urban population:Pre-COVID = 1<sup>st</sup> January 2018 – 31<sup>st</sup> January 2020 COVID-19 = 1<sup>st</sup> February 2020 – Jan 31<sup>st</sup> 2021

| <b>Pregnancy complications</b>       | <b>Pre-COVID-19</b><br>N=23 722<br>N (%) | <b>COVID-19</b><br>n = 10 381<br>N (%) | <b>P</b><br><b>value</b> |
|--------------------------------------|------------------------------------------|----------------------------------------|--------------------------|
| <b>Timing of birth</b>               |                                          |                                        |                          |
| Gestational age (weeks) median (IQR) | 39.2 (1.8)                               | 39.2 (1.8)                             | 0.25                     |
| <28 weeks                            | 301 (1.3)                                | 128 (1.2)                              | <0.001                   |
| 28-32 weeks                          | 232 (1.0)                                | 84 (0.8)                               |                          |
| <37 weeks                            | 1 439 (6.1)                              | 539 (5.2)                              |                          |
| 37+ weeks                            | 21 748 (91.7)                            | 9 630 (92.8)                           |                          |
| <b>Mode of delivery</b>              |                                          |                                        |                          |
| Vaginal birth                        | 13 931 (58.8)                            | 5 819 (56.1)                           | <0.001                   |
| Instrumental                         | 2 340 (9.9)                              | 1 016 (9.8)                            |                          |
| Vaginal breech                       | 204 (0.9)                                | 76 (0.7)                               |                          |
| Caesarean section                    | 7 224 (30.5)                             | 3 465 (33.4)                           |                          |
| <b>Onset of labour</b>               |                                          |                                        |                          |
| Induction                            | 7 095 (29.9)                             | 3 666 (35.3)                           | <0.001                   |
| <b>Birth weight</b>                  |                                          |                                        |                          |
| Appropriate for gestational age      | 20 071 (85.1)                            | 28 884 (85.5)                          | 0.39                     |
| Large for gestational age            | 1 676 (7.1)                              | 784 (7.6)                              | 0.11                     |
| Small for gestational age            | 1 832 (7.8)                              | 713 (6.9)                              | 0.01                     |
| <b>Adverse birth outcomes</b>        |                                          |                                        |                          |
| Stillbirth                           | 227 (1.0)                                | 95 (0.9)                               | 0.71                     |
| Apgar <7 at 5mins                    | 662 (2.8)                                | 257 (2.5)                              | 0.10                     |
| Intubation resuscitation at birth    | 262 (1.1)                                | 100 (1.0)                              | 0.24                     |
| Admission to NICU                    | 3 851 (16.2)                             | 1 743 (16.8)                           | 0.23                     |
| <b>Composite adverse neonatal</b>    |                                          |                                        |                          |
|                                      | 4 261 (18.2)                             | 1 907 (18.3)                           | 0.41                     |
| <b>Neonatal feeding</b>              |                                          |                                        |                          |
| Skin to skin at birth                | 16 454 (69.4)                            | 7 961 (76.7)                           | 0.02                     |
| Feeding within 1 hour                | 14 353 (60.5)                            | 6 424 (61.9)                           | 0.02                     |
| Fully breastfeeding at discharge     | 15 620 (65.8)                            | 6 410 (62.1)                           | <0.001                   |

Composite adverse neonatal includes any: stillbirth, admission to NICU, Apgar score under 7 at 5 minutes, or newborn resuscitation with intubation.

**Table 3.**

Odds ratio for maternal and neonatal pregnancy outcomes during the first year of COVID-19 compared to the previous two years in an Australian metropolitan health district  
 COVID = 1st February 2020 – Jan 31st 2021(n=10 381) Pre-COVID = 1st January 2018 – 31st January 2020 (n=23 722)

| Outcome                                  | Sample Size | Unadj. OR           | P      | Model 1 OR          | P      | Model 2 OR          | P      | Model 3 OR          | P      |
|------------------------------------------|-------------|---------------------|--------|---------------------|--------|---------------------|--------|---------------------|--------|
| Induction of labour                      | 34,082      | 0.90<br>(0.86,0.94) | <0.001 | 0.97<br>(0.92,1.02) | 0.30   | 0.97<br>(0.92,1.02) | 0.26   | -                   | -      |
| Caesarean birth                          | 34,063      | 1.14<br>(1.09,1.20) | <0.001 | 1.24<br>(1.17,1.30) | <0.001 | 1.23<br>(1.17,1.30) | <0.001 | 1.25<br>(1.19,1.32) | <0.001 |
| Preterm birth                            | 34,080      | 0.86<br>(0.79,0.94) | 0.00   | 0.91<br>(0.83,0.99) | 0.05   | 0.91<br>(0.83,0.99) | 0.03   | 0.88<br>(0.80,0.97) | 0.01   |
| Spontaneous preterm birth                | 34,080      | 0.76<br>(0.67,0.85) | <0.001 | 0.88<br>(0.77,0.99) | 0.04   | 0.88<br>(0.77,0.99) | 0.04   | 0.85<br>(0.75,0.97) | 0.02   |
| Small for gestational age at birth       | 33,880      | 0.88<br>(0.81,0.96) | 0.01   | 0.90<br>(0.82,0.99) | 0.03   | 0.90<br>(0.82,0.99) | 0.02   | -                   | -      |
| Composite adverse neonatal outcome       | 33,632      | 1.03<br>(0.97,1.09) | 0.38   | 1.08<br>(1.00,1.15) | 0.03   | 1.08<br>(1.00,1.15) | 0.04   | -                   | -      |
| Full breastfeeding at hospital discharge | 31,113      | 0.86<br>(0.81,0.90) | <0.001 | 0.85<br>(0.80,0.90) | <0.001 | 0.85<br>(0.81,0.90) | <0.001 | 0.85<br>(0.80,0.90) | <0.001 |

Composite adverse neonatal includes any: stillbirth, admission to NICU, Apgar score under 7 at 5 minutes, or newborn resuscitation with intubation.

**Variables adjusted for in each model:**

**Model 1 Maternal characteristics:** Includes maternal age, area-level socioeconomic status SEIFA disadvantage quintile, gestational age, parity, ethnicity, BMI (numeric), smoking status, and mental health status.

**Model 2 Model of care:** Model 1 variables and model of pregnancy care variable.

For preterm birth outcome the models are not adjusted for gestational age.

**Model 3 Outcome of interest:** Includes Model 1 and 2 covariates and additional covariates as listed below.  
 Caesarean section birth: birthweight and induction of labour.

Preterm birth: composite maternal complications variable (gestational diabetes or hypertensive disorders of pregnancy).

Breastfeeding: birthweight, mode of delivery, length of stay <24 hours and gestational age/preterm.



Supplementary Figure 1

Total COVID-19 cases during study period 1st Feb 2020 – Jan 31st 2021 Western Sydney Local Health District, NSW Australia; total cases 632 (open source data <https://data.nsw.gov.au>)



STROBE Statement—Checklist of items that should be included in reports of *cohort studies*

|                              | Item No | Recommendation                                                                                                                                                                                    | Page No           |
|------------------------------|---------|---------------------------------------------------------------------------------------------------------------------------------------------------------------------------------------------------|-------------------|
| <b>Title and abstract</b>    | 1       | (a) Indicate the study's design with a commonly used term in the title or the abstract                                                                                                            | ✓<br>1            |
|                              |         | (b) Provide in the abstract an informative and balanced summary of what was done and what was found                                                                                               | ✓<br>2            |
| <b>Introduction</b>          |         |                                                                                                                                                                                                   |                   |
| Background/rationale         | 2       | Explain the scientific background and rationale for the investigation being reported                                                                                                              | ✓<br>4-5          |
| Objectives                   | 3       | State specific objectives, including any prespecified hypotheses                                                                                                                                  | ✓<br>4-5          |
| <b>Methods</b>               |         |                                                                                                                                                                                                   |                   |
| Study design                 | 4       | Present key elements of study design early in the paper                                                                                                                                           | ✓<br>6            |
| Setting                      | 5       | Describe the setting, locations, and relevant dates, including periods of recruitment, exposure, follow-up, and data collection                                                                   | ✓<br>6-7          |
| Participants                 | 6       | (a) Give the eligibility criteria, and the sources and methods of selection of participants. Describe methods of follow-up                                                                        | ✓<br>7-8          |
|                              |         | (b) For matched studies, give matching criteria and number of exposed and unexposed                                                                                                               | -                 |
| Variables                    | 7       | Clearly define all outcomes, exposures, predictors, potential confounders, and effect modifiers. Give diagnostic criteria, if applicable                                                          | ✓<br>7-8          |
| Data sources/<br>measurement | 8*      | For each variable of interest, give sources of data and details of methods of assessment (measurement). Describe comparability of assessment methods if there is more than one group              | ✓<br>6-8          |
| Bias                         | 9       | Describe any efforts to address potential sources of bias                                                                                                                                         | ✓<br>6-7          |
| Study size                   | 10      | Explain how the study size was arrived at                                                                                                                                                         | ✓<br>6-7          |
| Quantitative variables       | 11      | Explain how quantitative variables were handled in the analyses. If applicable, describe which groupings were chosen and why                                                                      | ✓<br>6-8          |
| Statistical methods          | 12      | (a) Describe all statistical methods, including those used to control for confounding                                                                                                             | ✓<br>8-9          |
|                              |         | (b) Describe any methods used to examine subgroups and interactions                                                                                                                               | ✓<br>8-9          |
|                              |         | (c) Explain how missing data were addressed                                                                                                                                                       | ✓<br>9            |
|                              |         | (d) If applicable, explain how loss to follow-up was addressed                                                                                                                                    | -                 |
|                              |         | (e) Describe any sensitivity analyses                                                                                                                                                             | -                 |
| <b>Results</b>               |         |                                                                                                                                                                                                   |                   |
| Participants                 | 13*     | (a) Report numbers of individuals at each stage of study—eg numbers potentially eligible, examined for eligibility, confirmed eligible, included in the study, completing follow-up, and analysed | ✓<br>10<br>Tables |
|                              |         | (b) Give reasons for non-participation at each stage                                                                                                                                              | ✓<br>10<br>Tables |
|                              |         | (c) Consider use of a flow diagram                                                                                                                                                                | -                 |
| Descriptive data             | 14*     | (a) Give characteristics of study participants (eg demographic, clinical, social) and information on exposures and potential confounders                                                          | ✓<br>10<br>Tables |

1  
2  
3  
4  
5  
6  
7  
8  
9  
10  
11  
12  
13  
14  
15  
16  
17  
18  
19  
20  
21  
22  
23  
24  
25  
26  
27  
28  
29  
30  
31  
32  
33  
34  
35  
36  
37  
38  
39  
40  
41  
42  
43  
44  
45  
46  
47  
48  
49  
50  
51  
52  
53  
54  
55  
56  
57  
58  
59  
60

(b) Indicate number of participants with missing data for each variable of interest

✓  
tables

(c) Summarise follow-up time (eg, average and total amount)

-

Outcome data

15\*

Report numbers of outcome events or summary measures over time

✓  
10-11  
Tables

For peer review only

|                                      |                          |    |                                                                                                                                                                                                                                                                                                                                                                                                               |                      |
|--------------------------------------|--------------------------|----|---------------------------------------------------------------------------------------------------------------------------------------------------------------------------------------------------------------------------------------------------------------------------------------------------------------------------------------------------------------------------------------------------------------|----------------------|
| 1<br>2<br>3<br>4<br>5<br>6<br>7<br>8 | Main results             | 16 | (a) Give unadjusted estimates and, if applicable, confounder-adjusted estimates and their precision (eg, 95% confidence interval). Make clear which confounders were adjusted for and why they were included<br>(b) Report category boundaries when continuous variables were categorized<br>(c) If relevant, consider translating estimates of relative risk into absolute risk for a meaningful time period | ✓<br>Tables<br>10-11 |
| 9<br>10<br>11                        | Other analyses           | 17 | Report other analyses done—eg analyses of subgroups and interactions, and sensitivity analyses                                                                                                                                                                                                                                                                                                                | ✓<br>Tables<br>10-11 |
| 12                                   | <b>Discussion</b>        |    |                                                                                                                                                                                                                                                                                                                                                                                                               |                      |
| 13<br>14                             | Key results              | 18 | Summarise key results with reference to study objectives                                                                                                                                                                                                                                                                                                                                                      | ✓<br>12              |
| 15<br>16<br>17                       | Limitations              | 19 | Discuss limitations of the study, taking into account sources of potential bias or imprecision. Discuss both direction and magnitude of any potential bias                                                                                                                                                                                                                                                    | ✓<br>12-13           |
| 18<br>19                             | Interpretation           | 20 | Give a cautious overall interpretation of results considering objectives, limitations, multiplicity of analyses, results from similar studies, and other relevant evidence                                                                                                                                                                                                                                    | ✓<br>13-15           |
| 20<br>21                             | Generalisability         | 21 | Discuss the generalisability (external validity) of the study results                                                                                                                                                                                                                                                                                                                                         | ✓<br>14-15           |
| 22                                   | <b>Other information</b> |    |                                                                                                                                                                                                                                                                                                                                                                                                               |                      |
| 23<br>24<br>25                       | Funding                  | 22 | Give the source of funding and the role of the funders for the present study and, if applicable, for the original study on which the present article is based                                                                                                                                                                                                                                                 | ✓<br>3               |

\*Give information separately for exposed and unexposed groups.

**Note:** An Explanation and Elaboration article discusses each checklist item and gives methodological background and published examples of transparent reporting. The STROBE checklist is best used in conjunction with this article (freely available on the Web sites of PLoS Medicine at <http://www.plosmedicine.org/>, Annals of Internal Medicine at <http://www.annals.org/>, and Epidemiology at <http://www.epidem.com/>). Information on the STROBE Initiative is available at <http://www.strobe-statement.org>.
