# Supplementary material for: Investigating service delivery and perinatal outcomes during the low prevalence first year of COVID-19 in a multiethnic Australian population: a cohort study
Source: PubMed Central journal article supplement — BMJ Open. 2022 Jul 12;12(7):e062409. doi: 10.1136/bmjopen-2022-062409 (PMC9277027; doi:10.1136/bmjopen-2022-062409), 2022-07-12

**Supplementary Figure 1**

Total COVID-19 cases during study period 1st Feb 2020 – Jan 31<sup>st</sup> 2021 Western Sydney Local Health District, NSW Australia; total cases 632 (open source data <https://data.nsw.gov.au>)

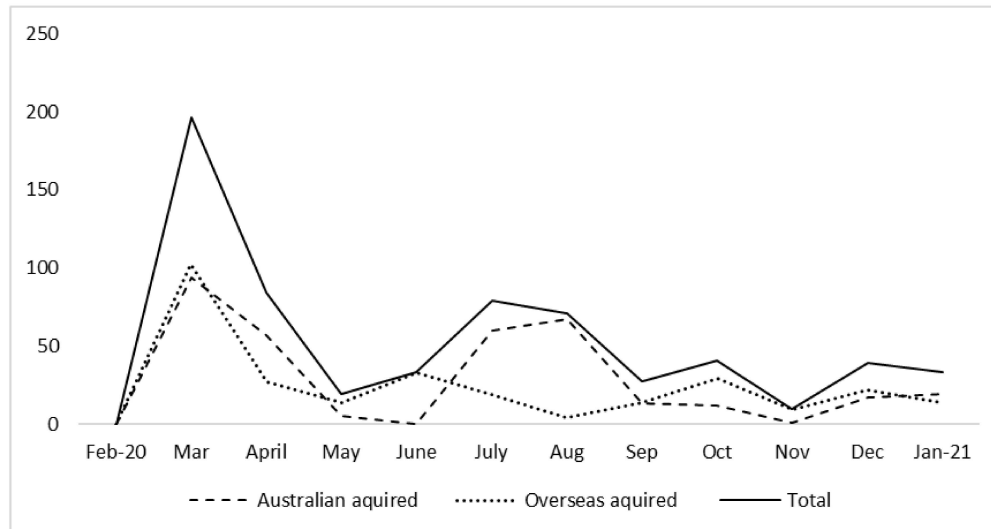

Supplement: bmjopen-2022-062409supp001.pdf [file bmjopen-2022-062409supp001.pdf]
